# Supplementary material for: Vitamin D induces SIRT1 activation through K610 deacetylation in colon cancer
Source: eLife journal article supplement (doi:10.7554/elife.86913), 2023-05-09

Figure 1B

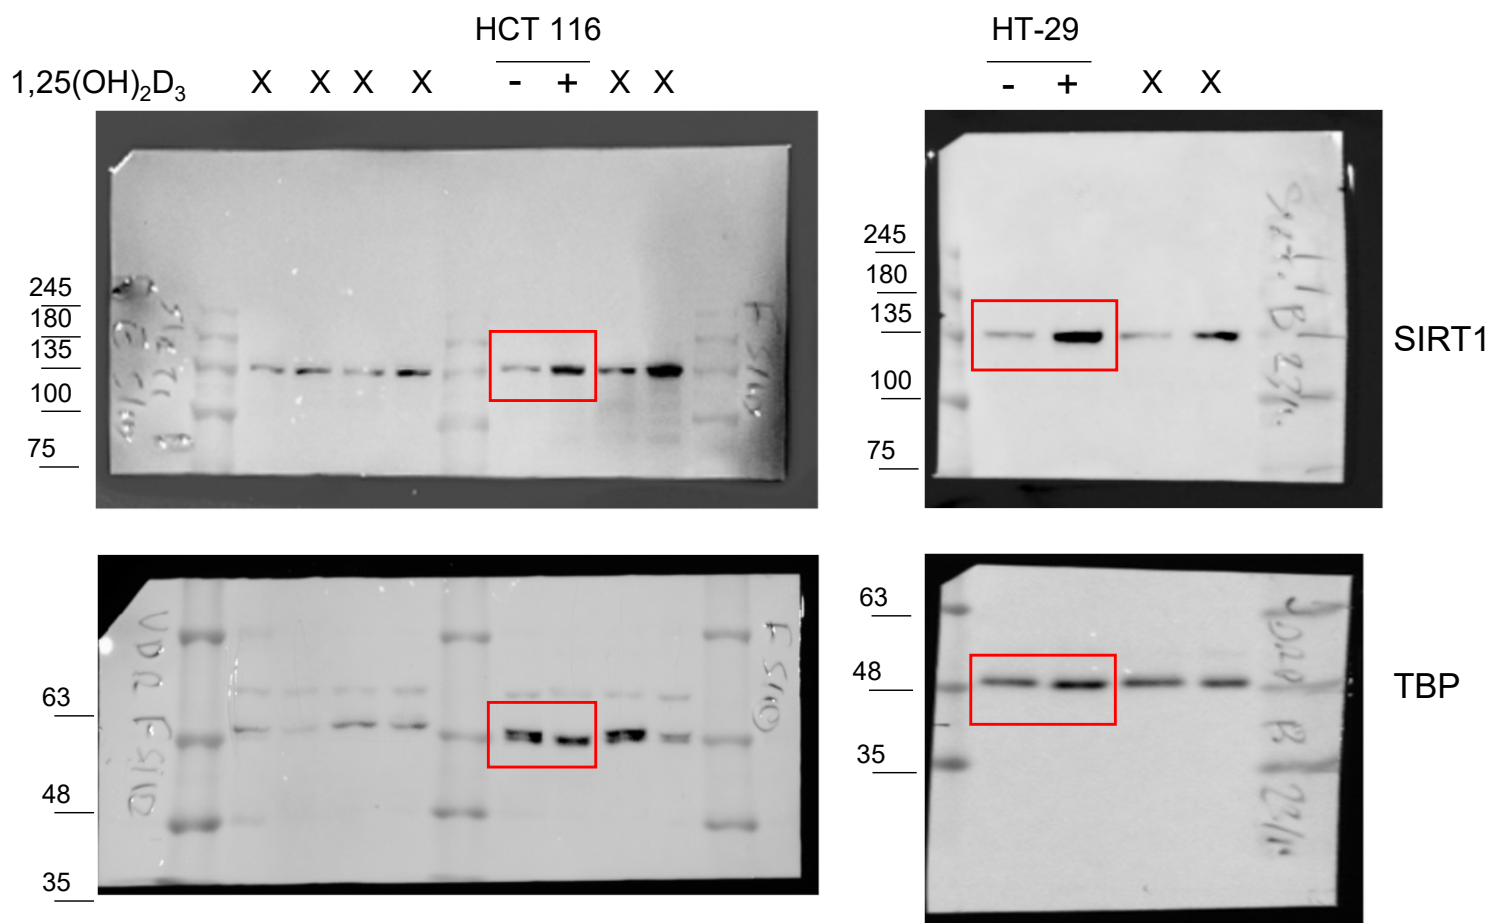

Figure 1G

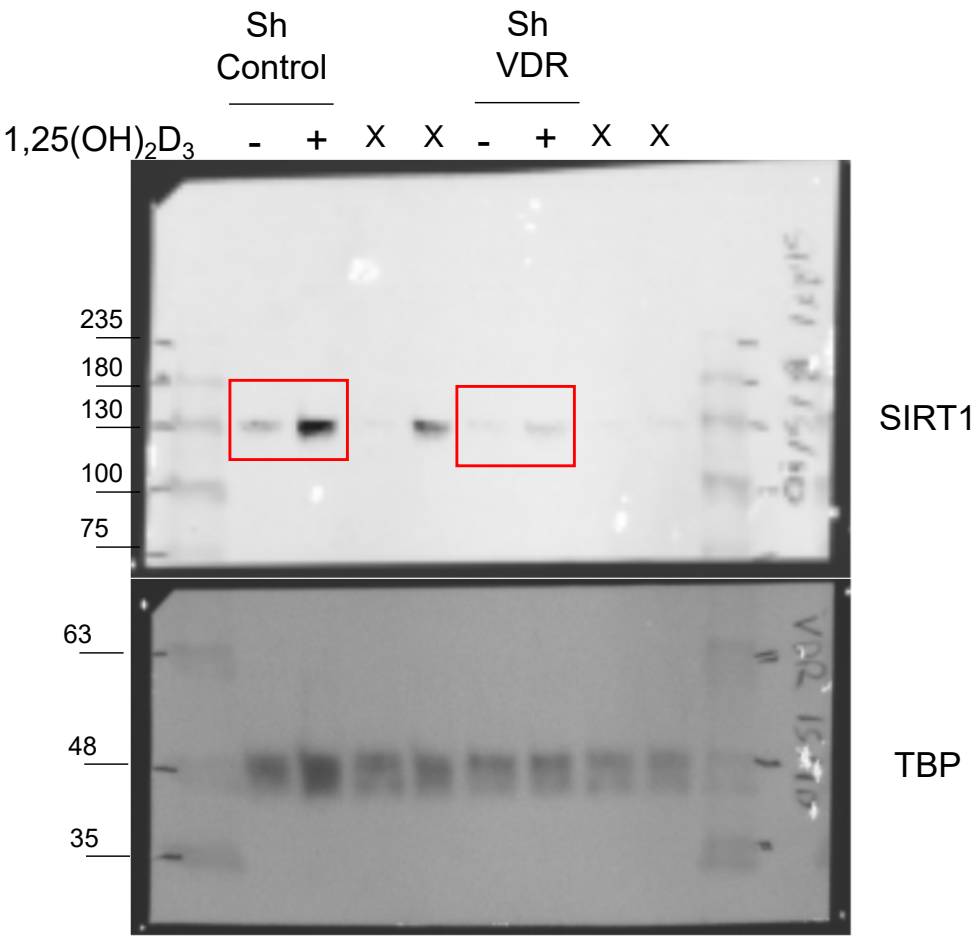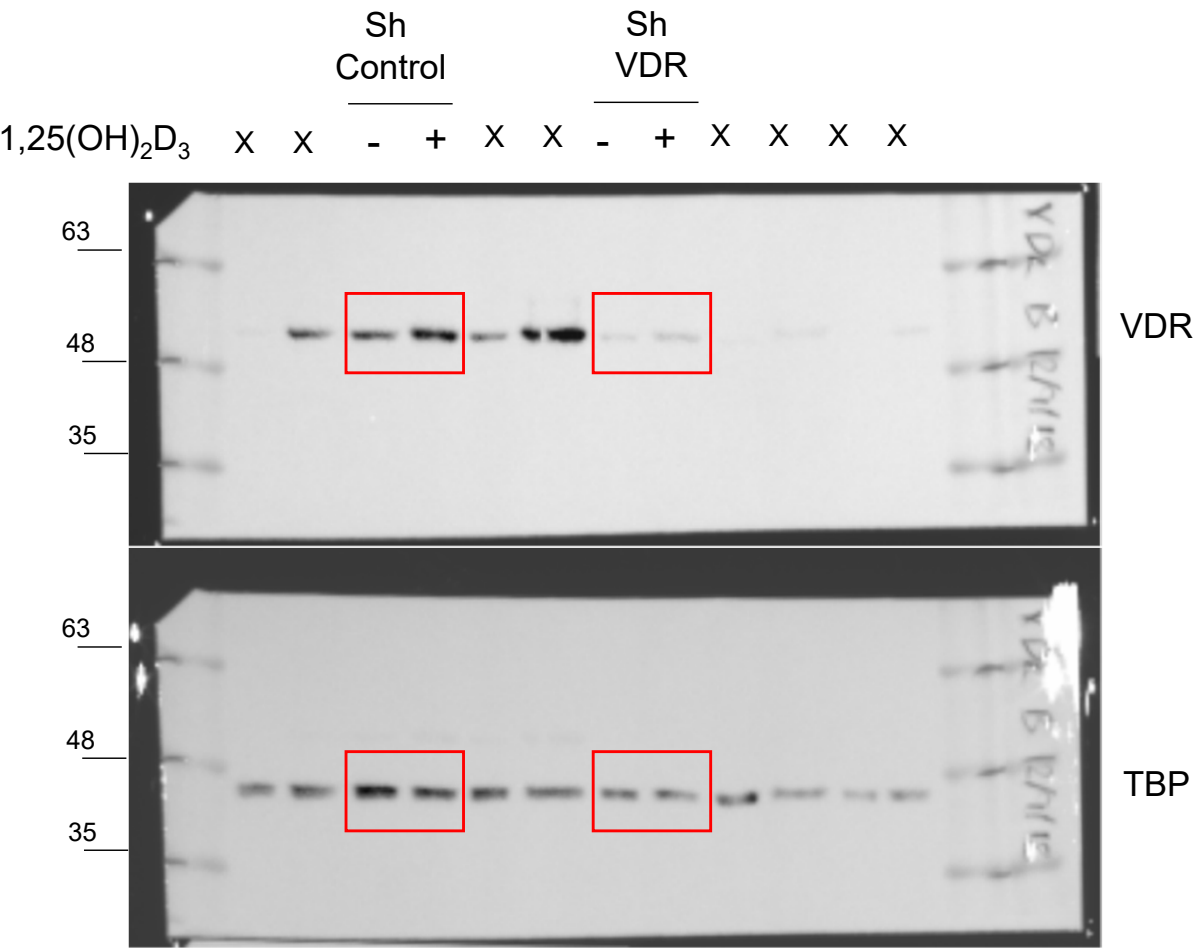

Figure 1H

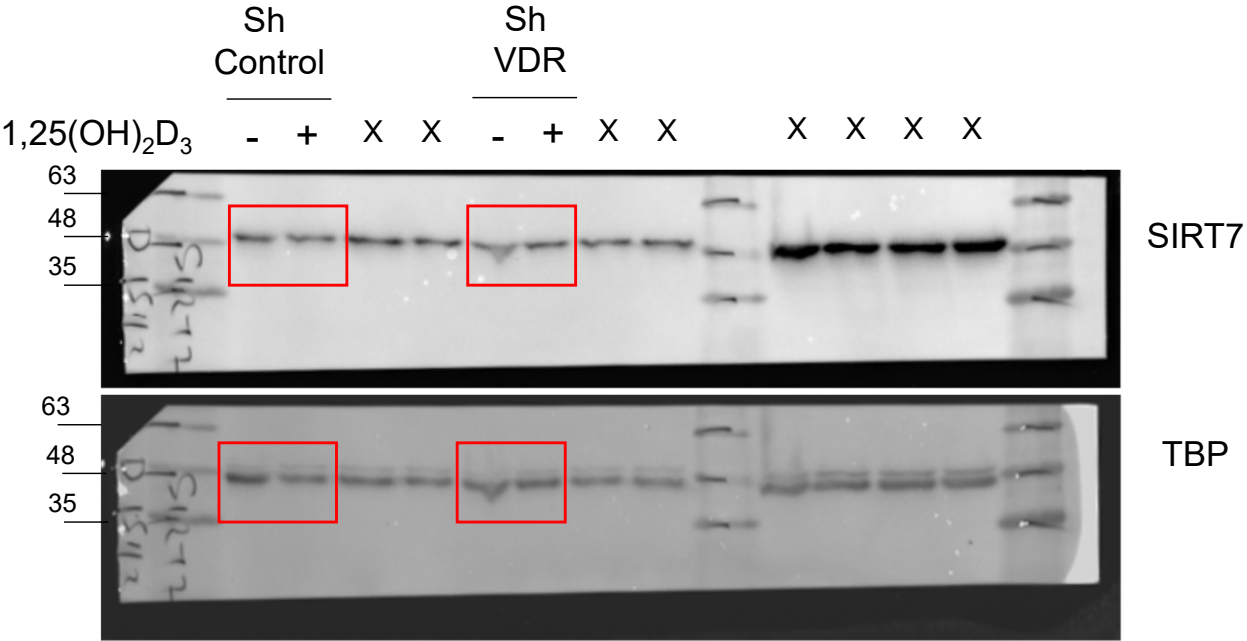

Figure 2C

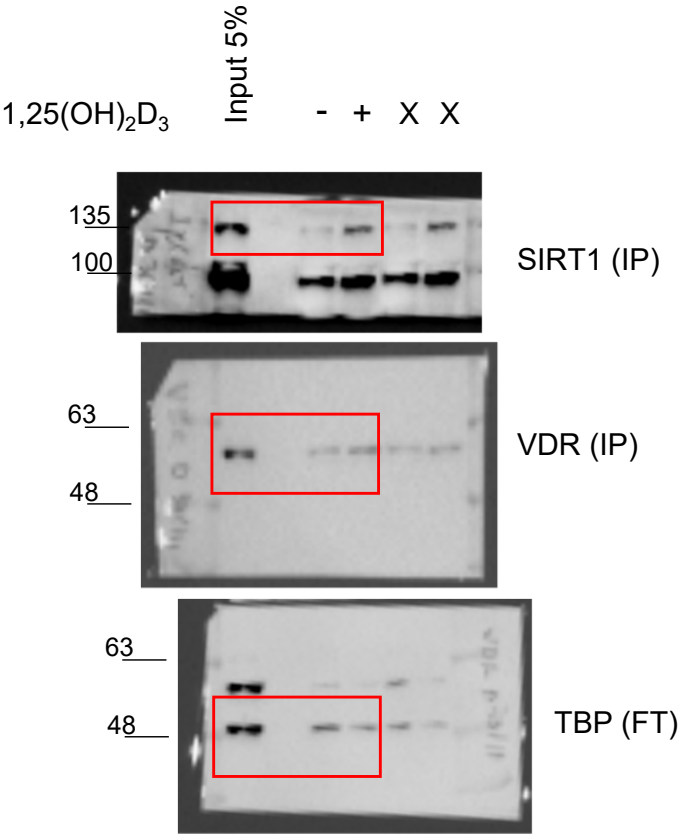

Figure 2D

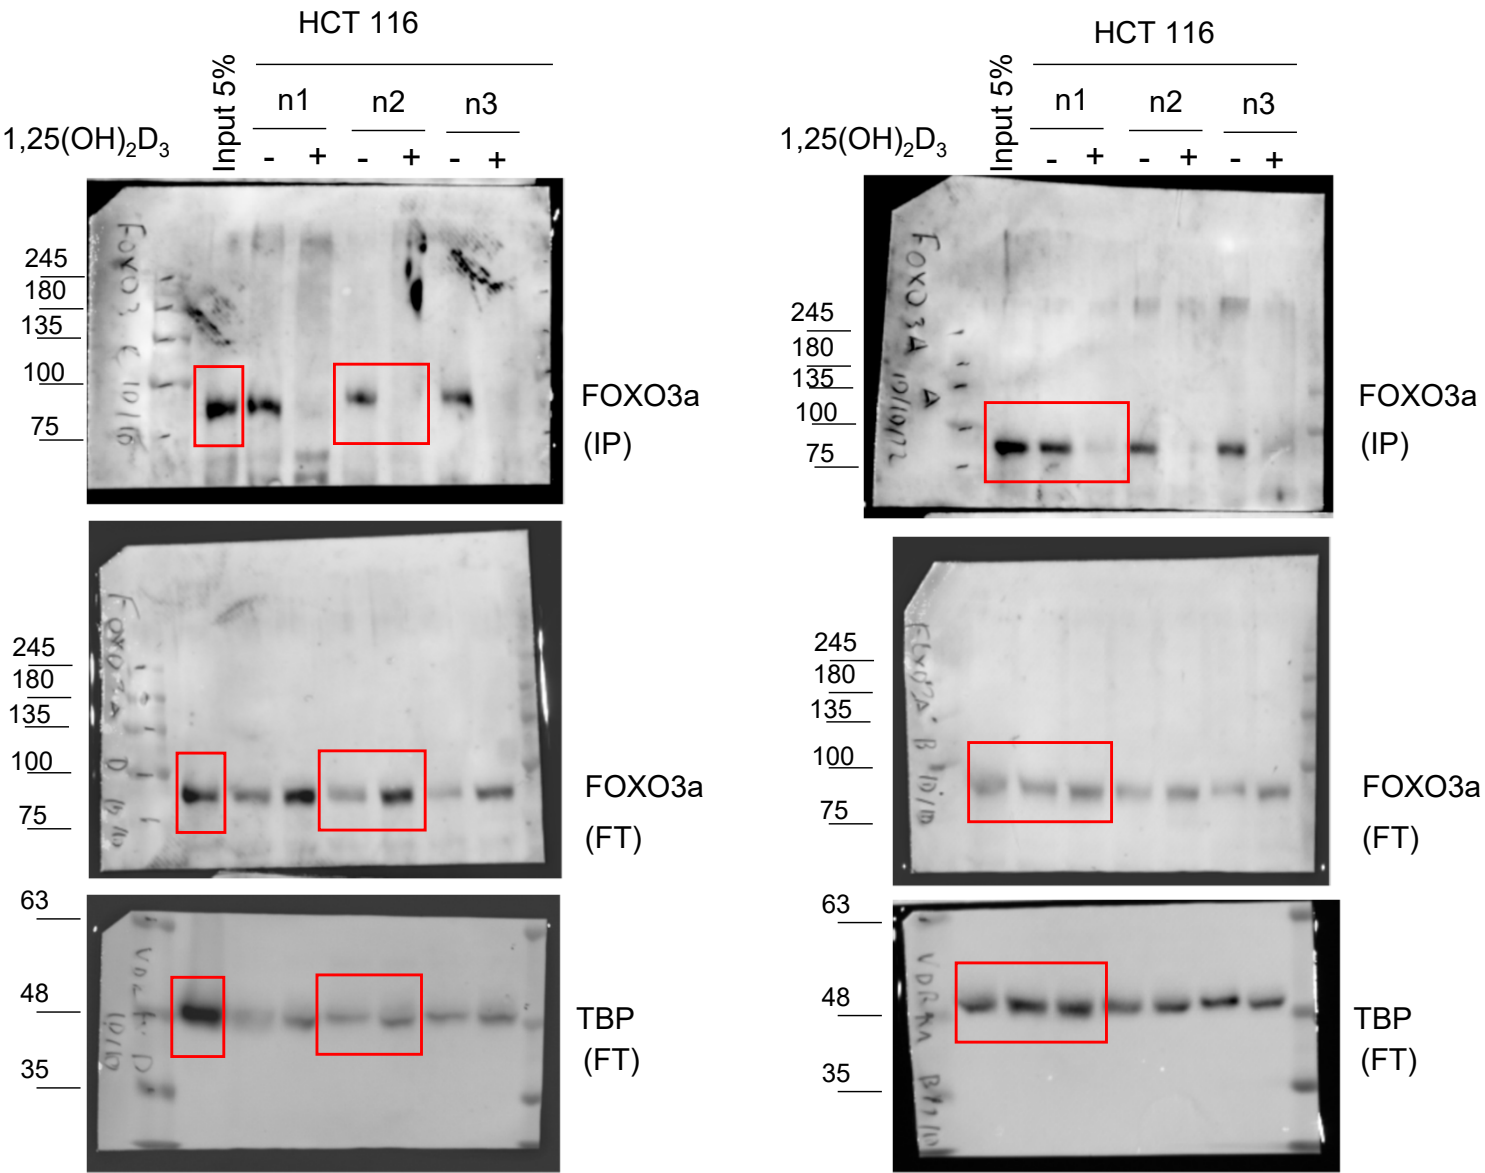

Figure 2E

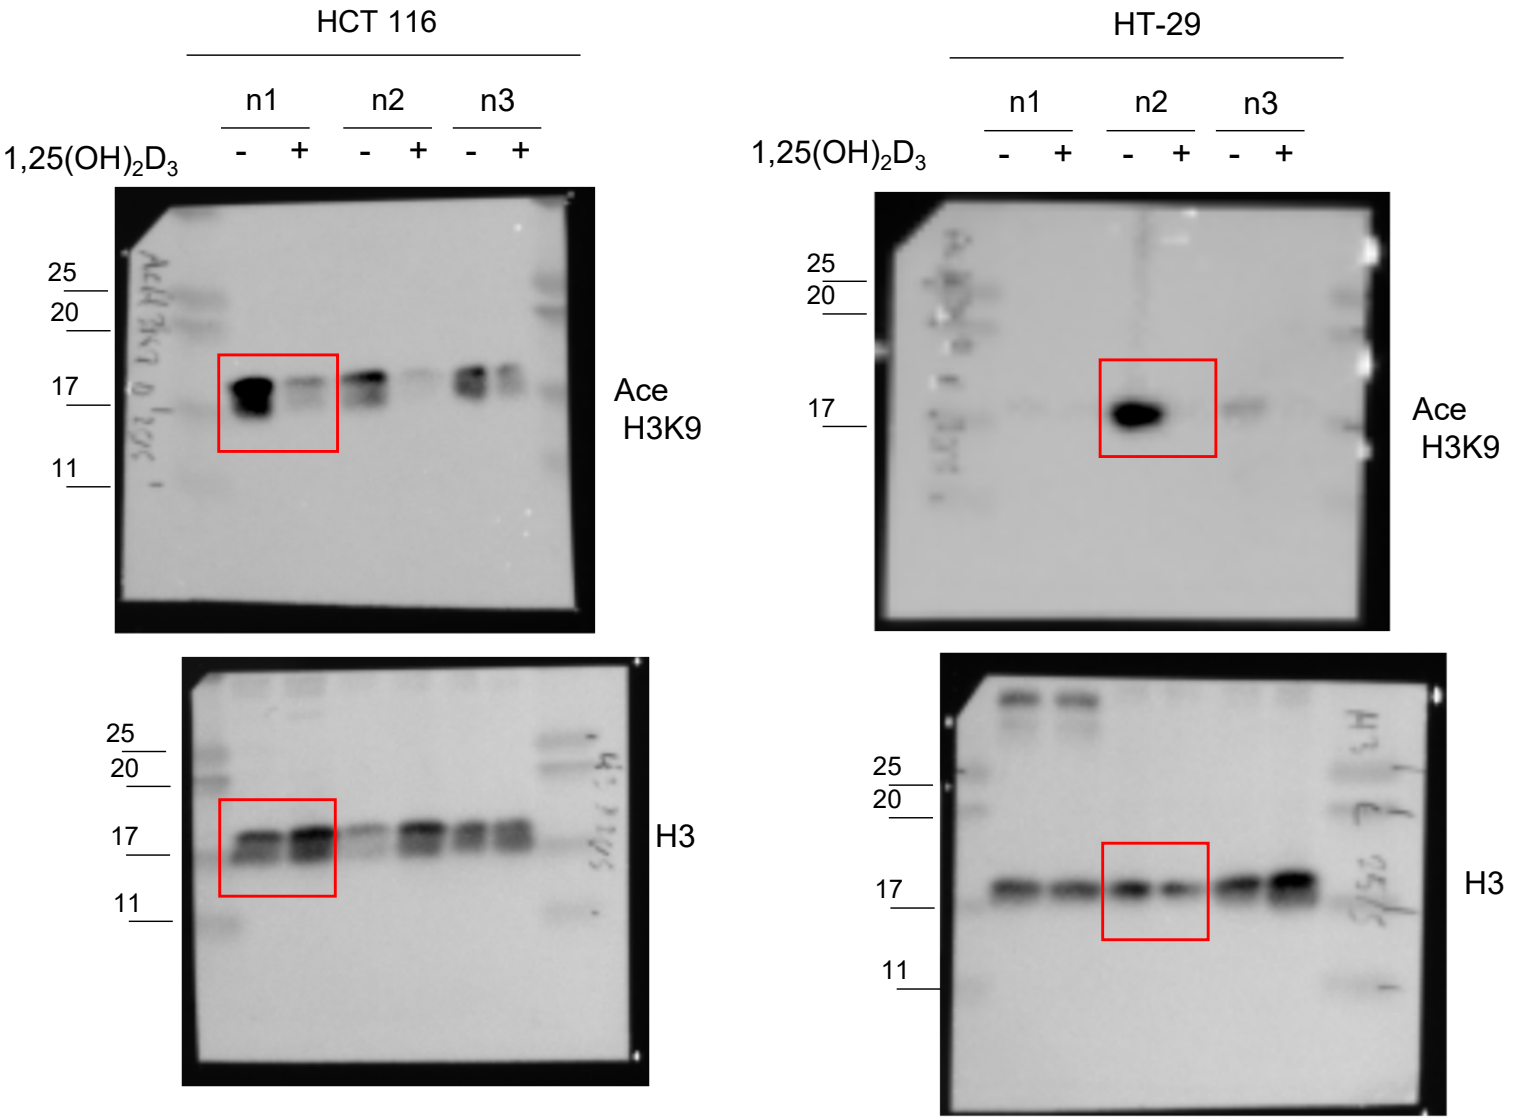

HT-29

n1

n2

n3

-

+

-

+

-

+

1,25(OH)<sub>2</sub>D<sub>3</sub>

25

20

17

Ace  
H3K9

25

20

17

11

H3

Figure 2F

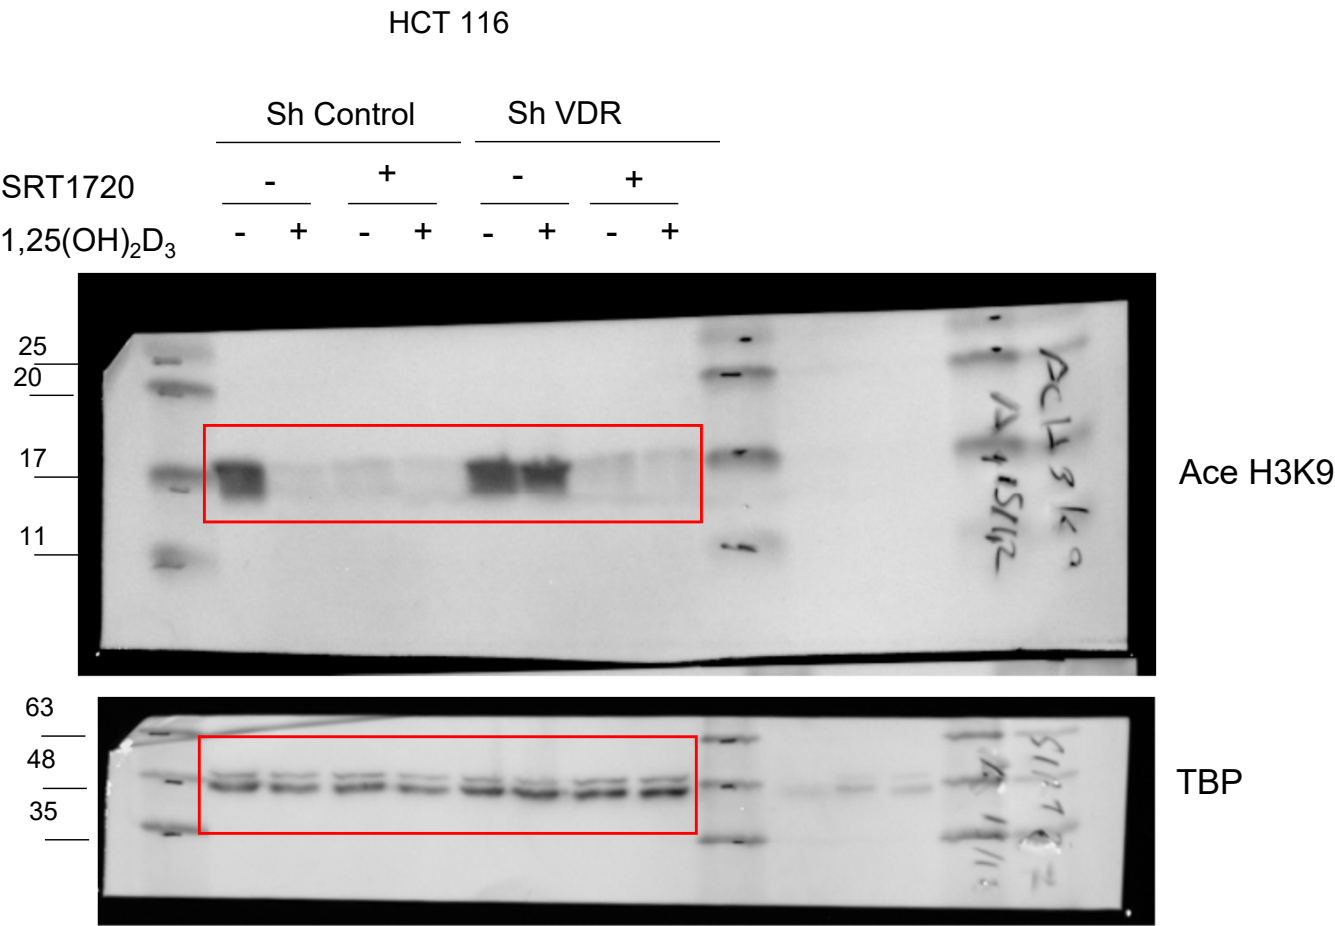

Figure 2G

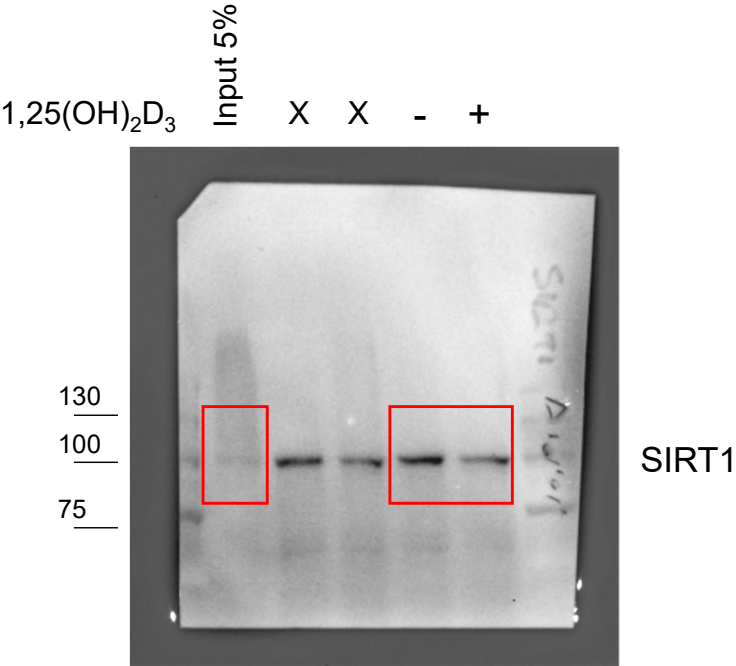



Figure 3F

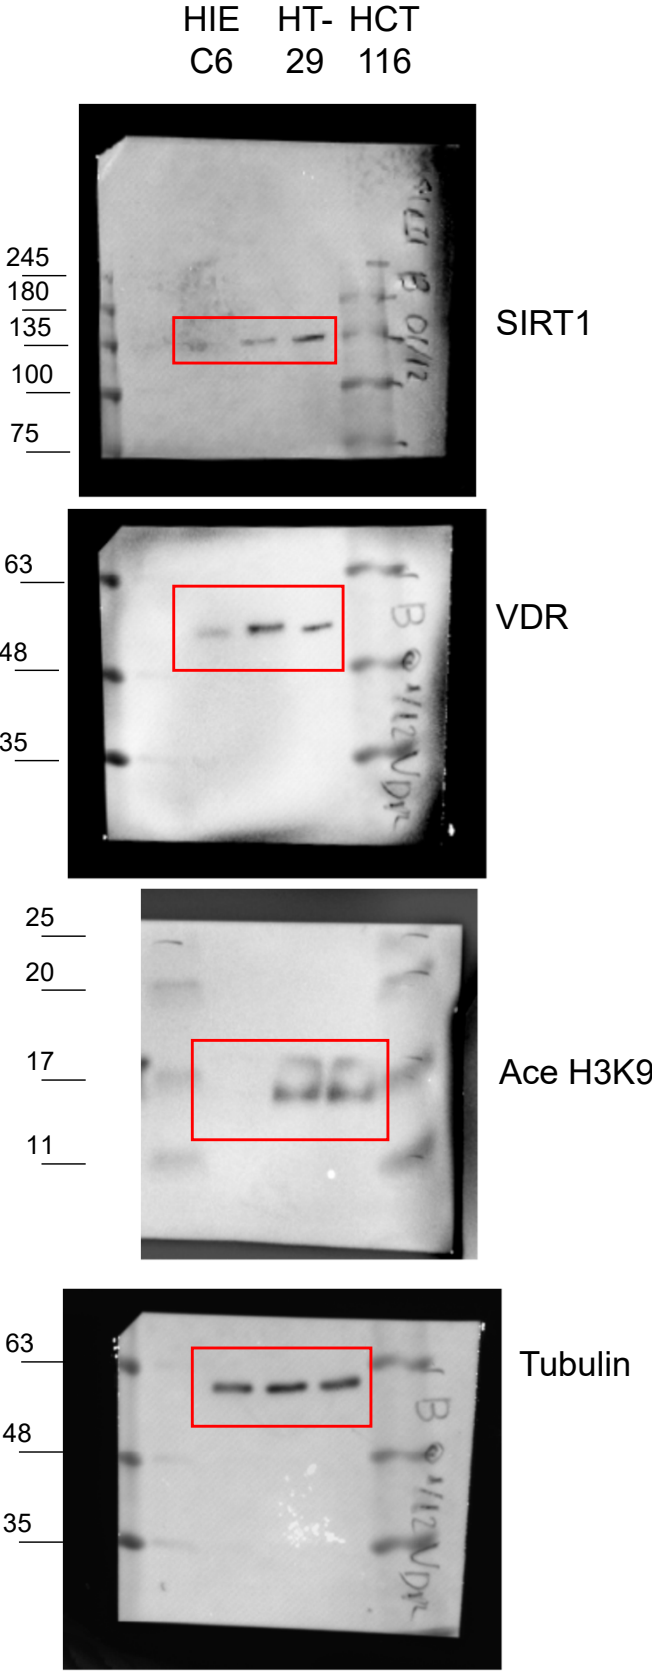

Figure 3G

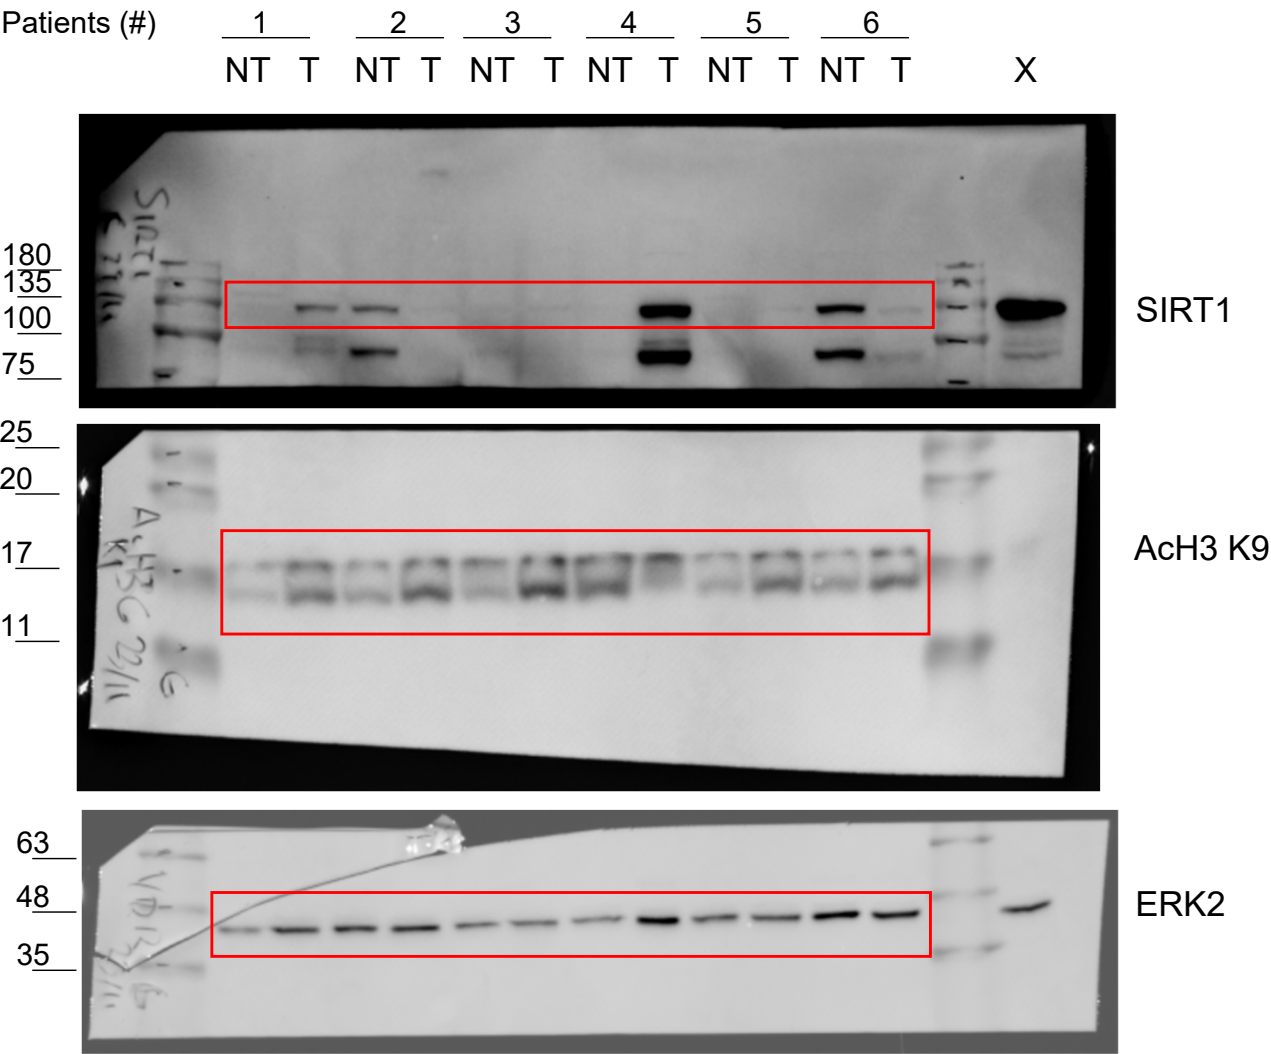

Figure 3H

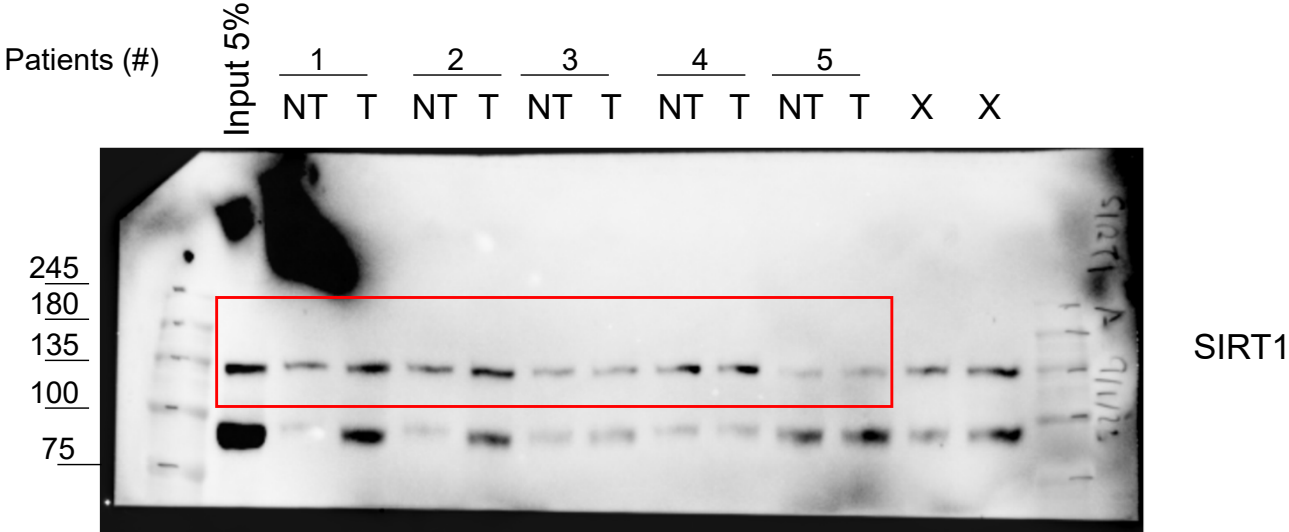

Figure 3I

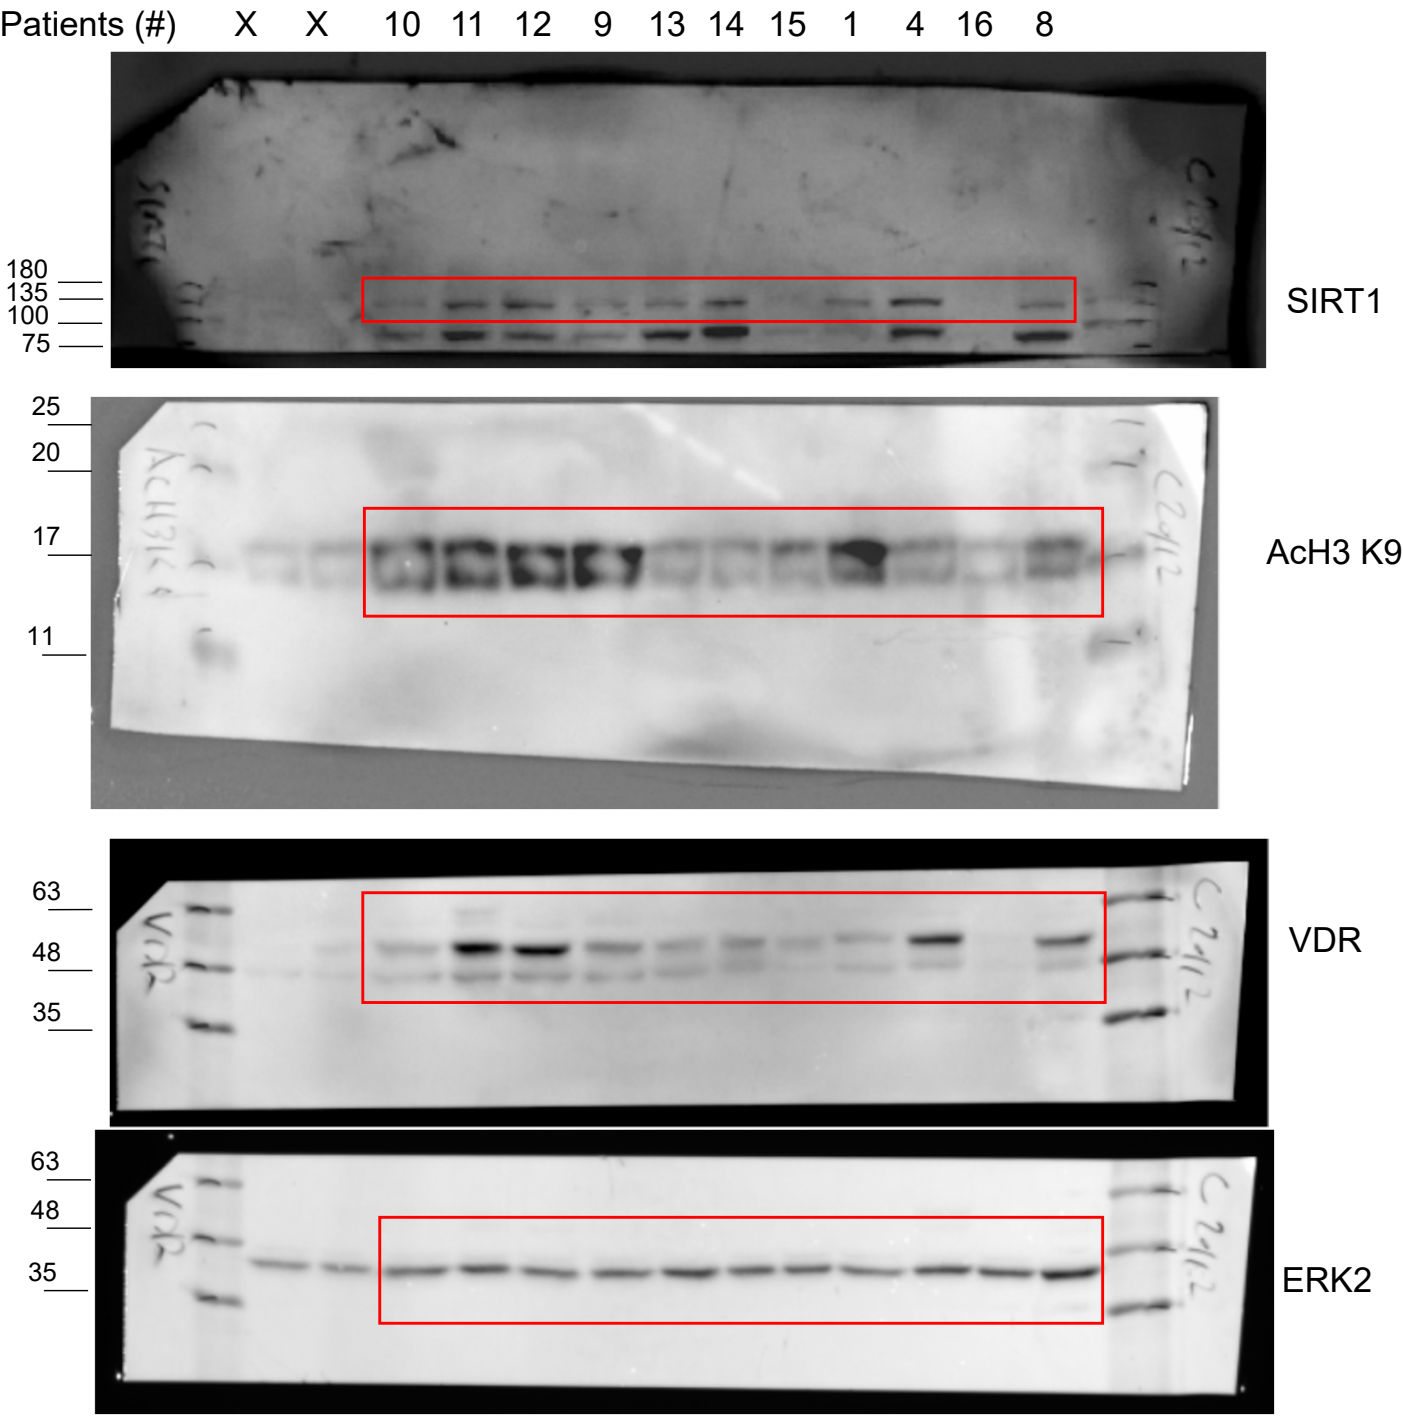

Figure 3J

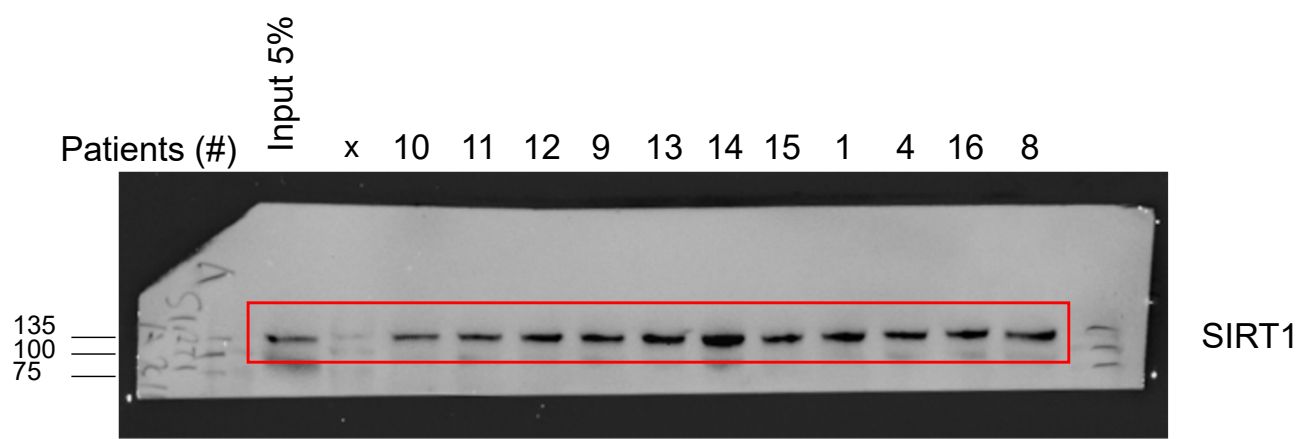

Figure 4A

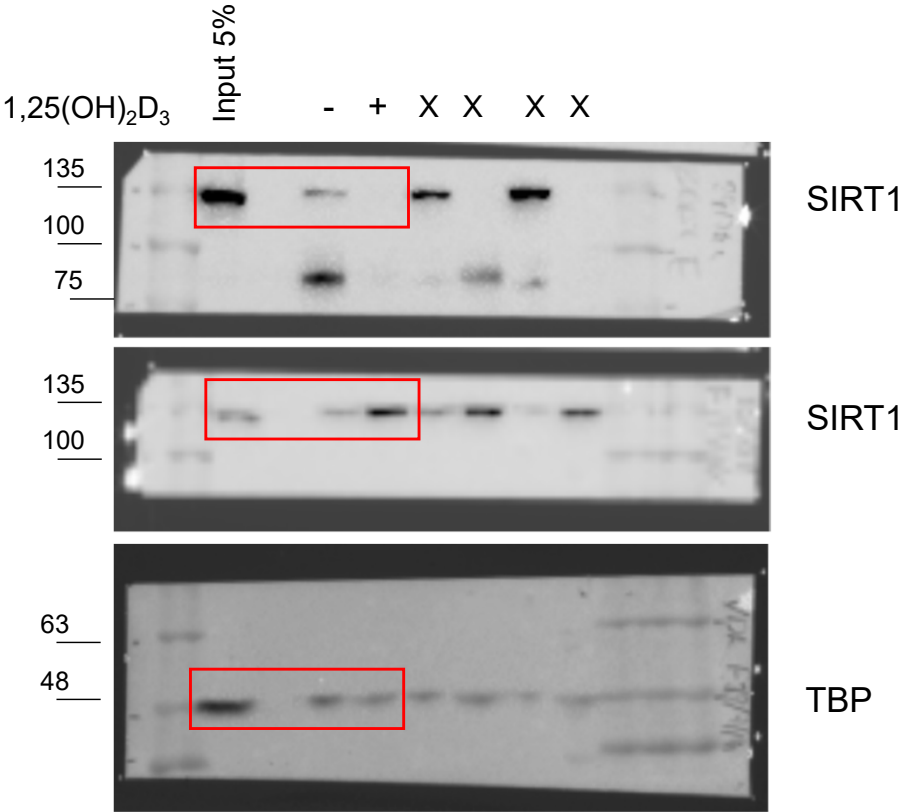

Figure 4B

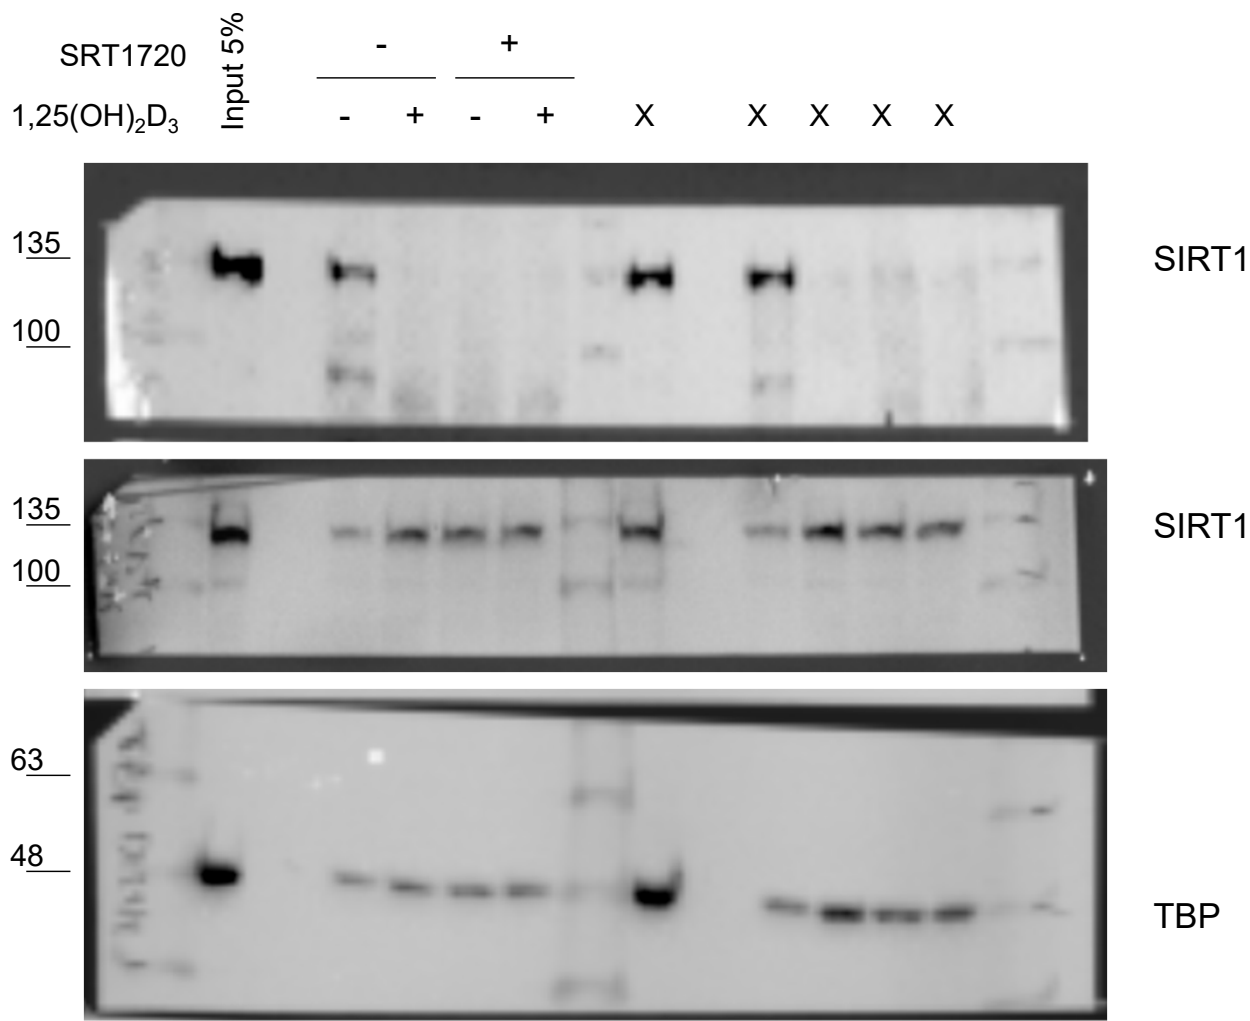

Figure 4C

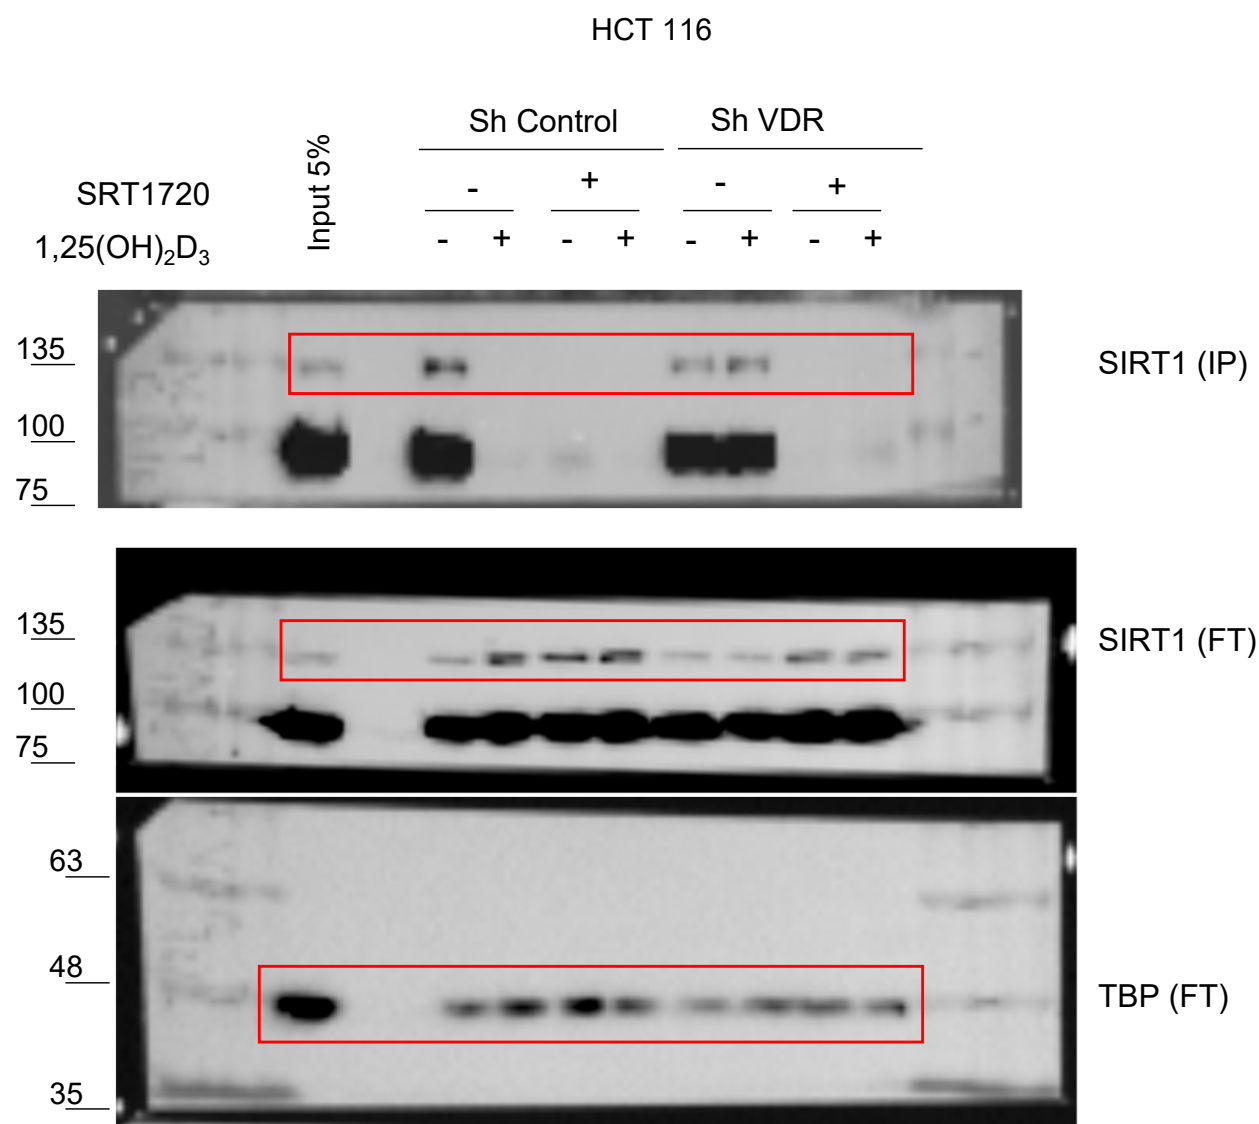



low exposure

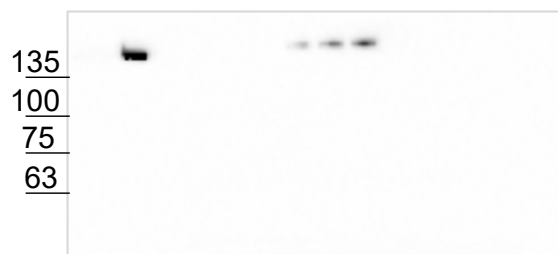

High exposure

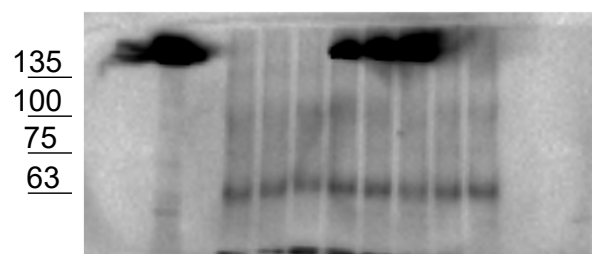

Suppl Fig 1

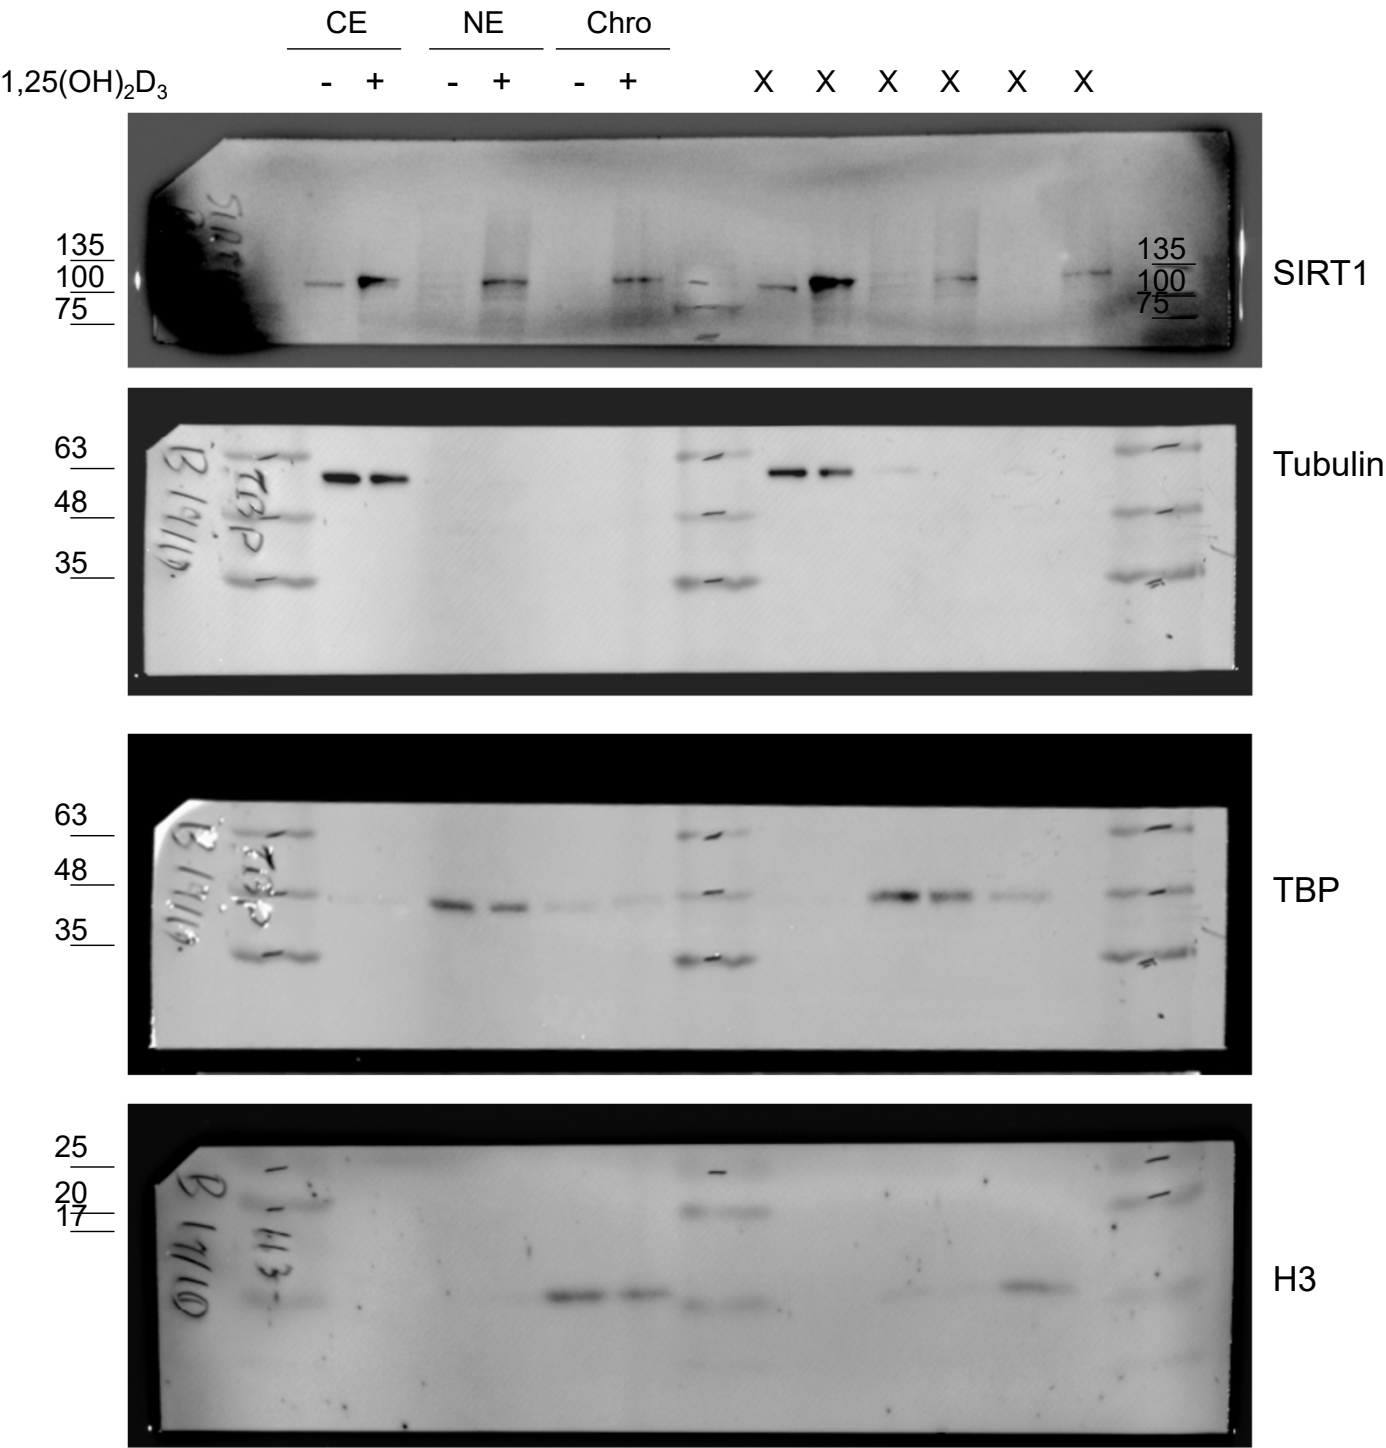

Supplement: fig1-data1 [file Fig.1B_raw data_pdf.pdf › Fig1_source data/Fig 1B_raw TIFFand PDF/Fig.1B_raw data_pdf.pdf]
