# Supplementary figures and images for: Vitamin D induces SIRT1 activation through K610 deacetylation in colon cancer
Source: eLife journal article supplement (doi:10.7554/elife.86913), 2023-05-09

Figure 1G

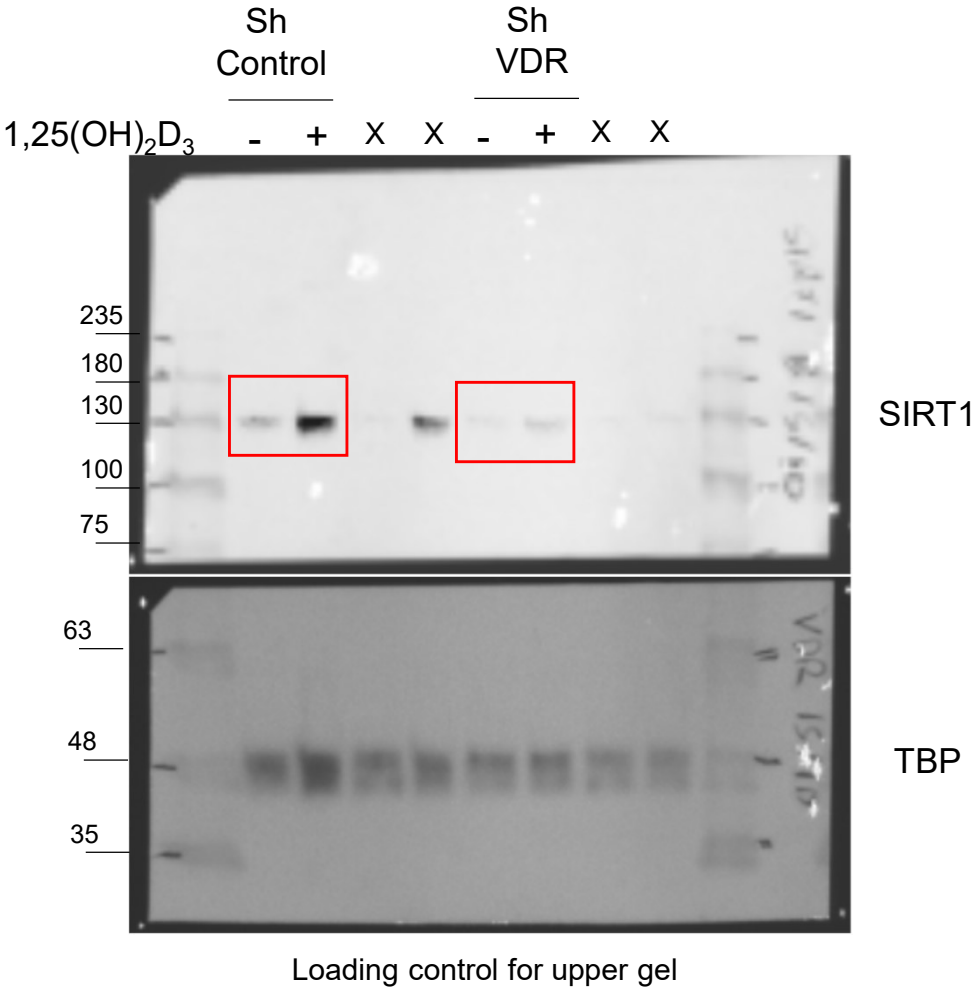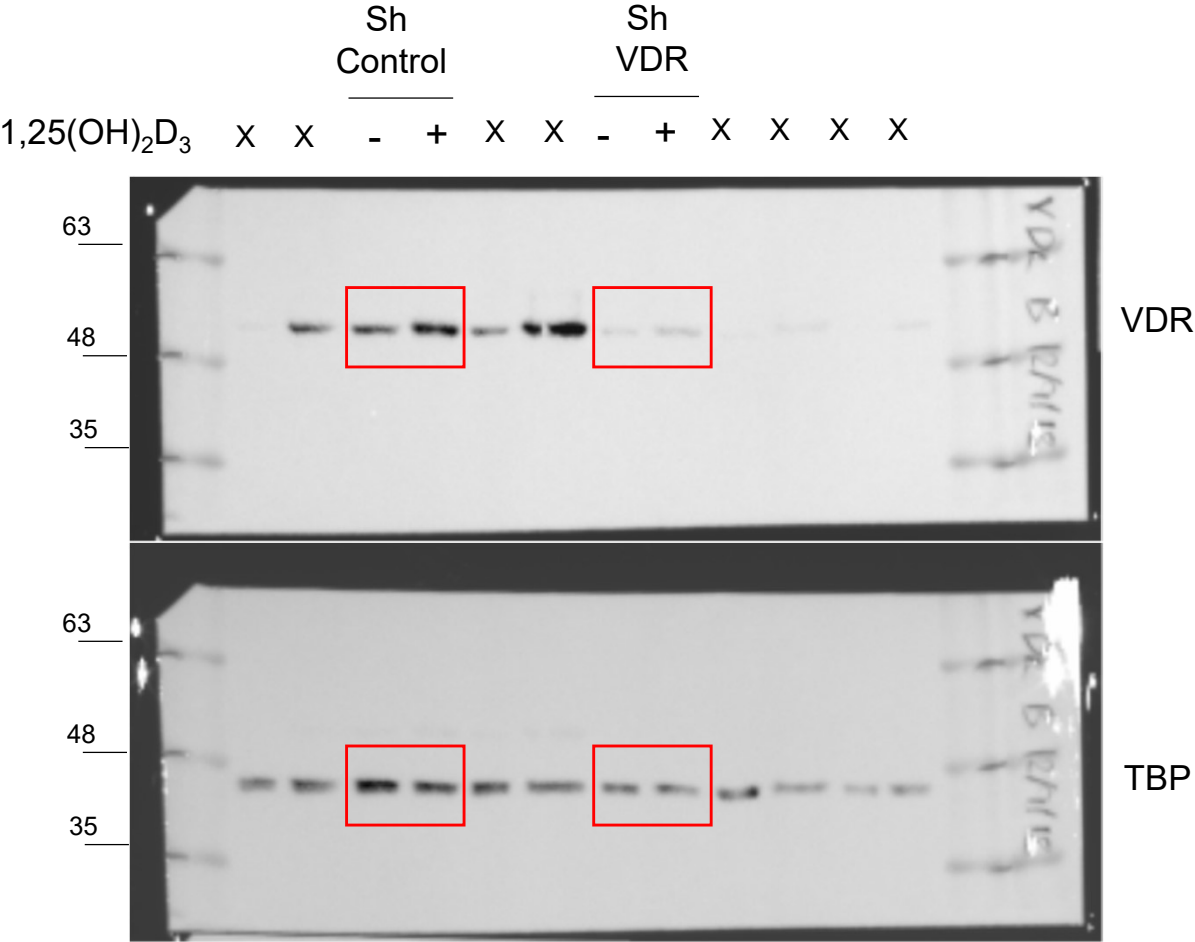

Supplement: fig1-data1 [file PDF Fig 1G.pdf › Fig1_source data/Fig 1G_raw TIFFand PDF/PDF Fig 1G.pdf]

Figure 1H

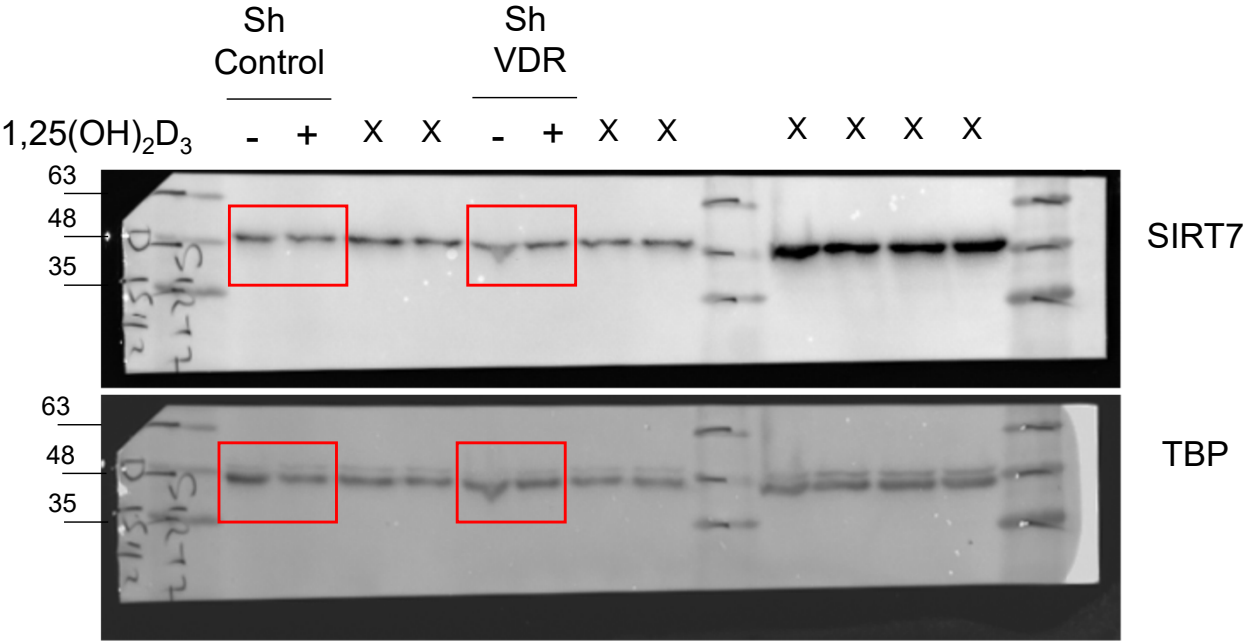

Supplement: fig1-data1 [file Fig 1H_raw PDF.pdf › Fig1_source data/Fig 1H_raw DATA_PDF and TIFF/Fig 1H_raw PDF.pdf]

Figure 2C

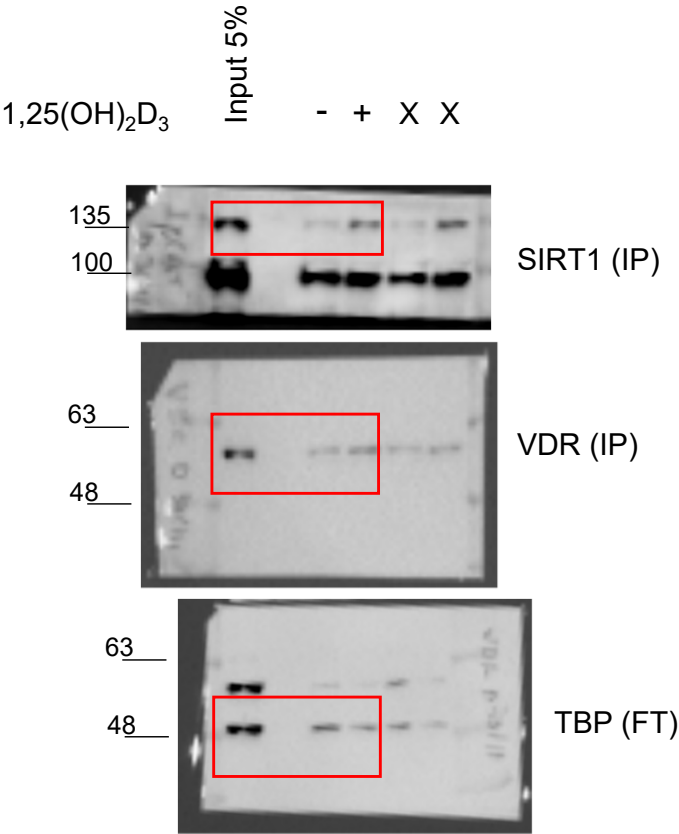

Supplement: fig2-data1 [file Fig.2C_raw data_pdf.pdf › Fig2_source data/Fig 2C_raw TIFFand PDF/Fig.2C_raw data_pdf.pdf]

Figure 2D

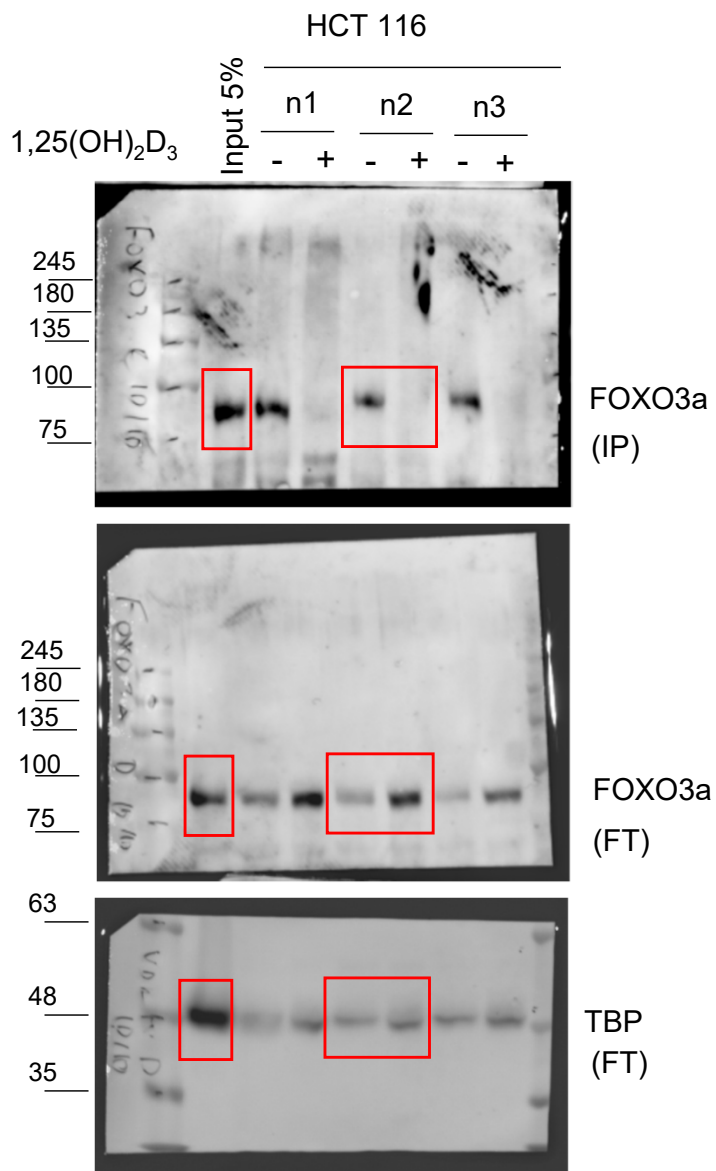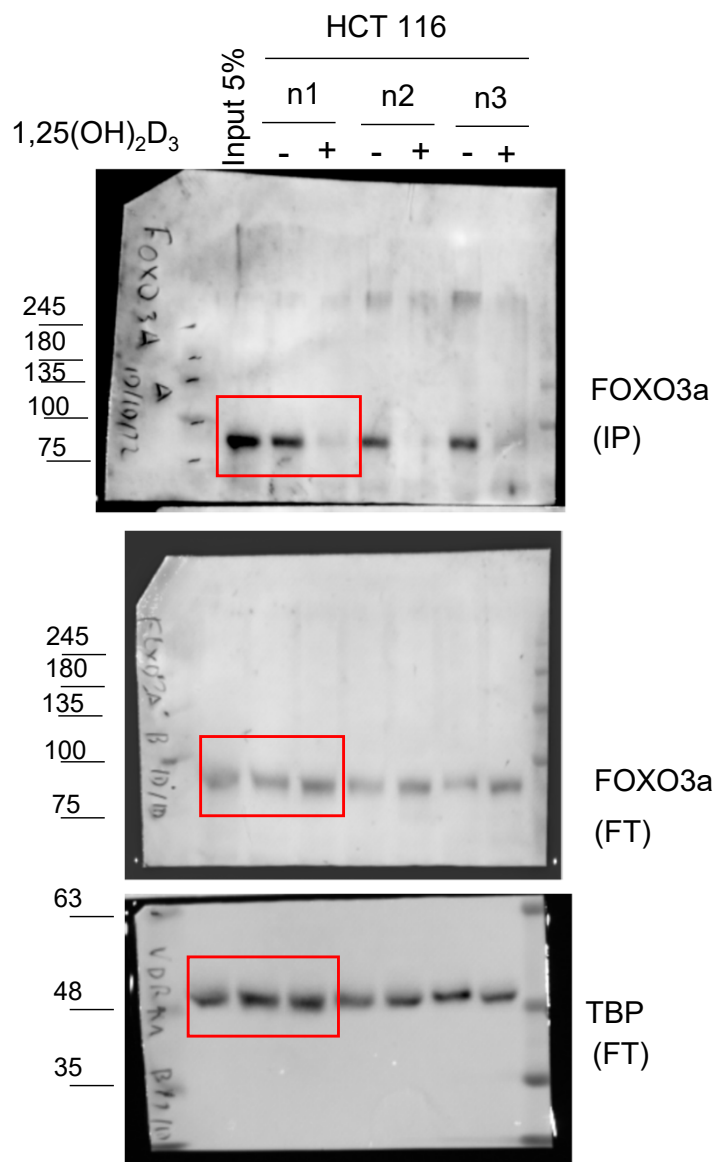

Supplement: fig2-data1 [file Fig.2D_raw data_pdf.pdf › Fig2_source data/Fig 2D_raw TIFFand PDF/Fig.2D_raw data_pdf.pdf]

Figure 2E

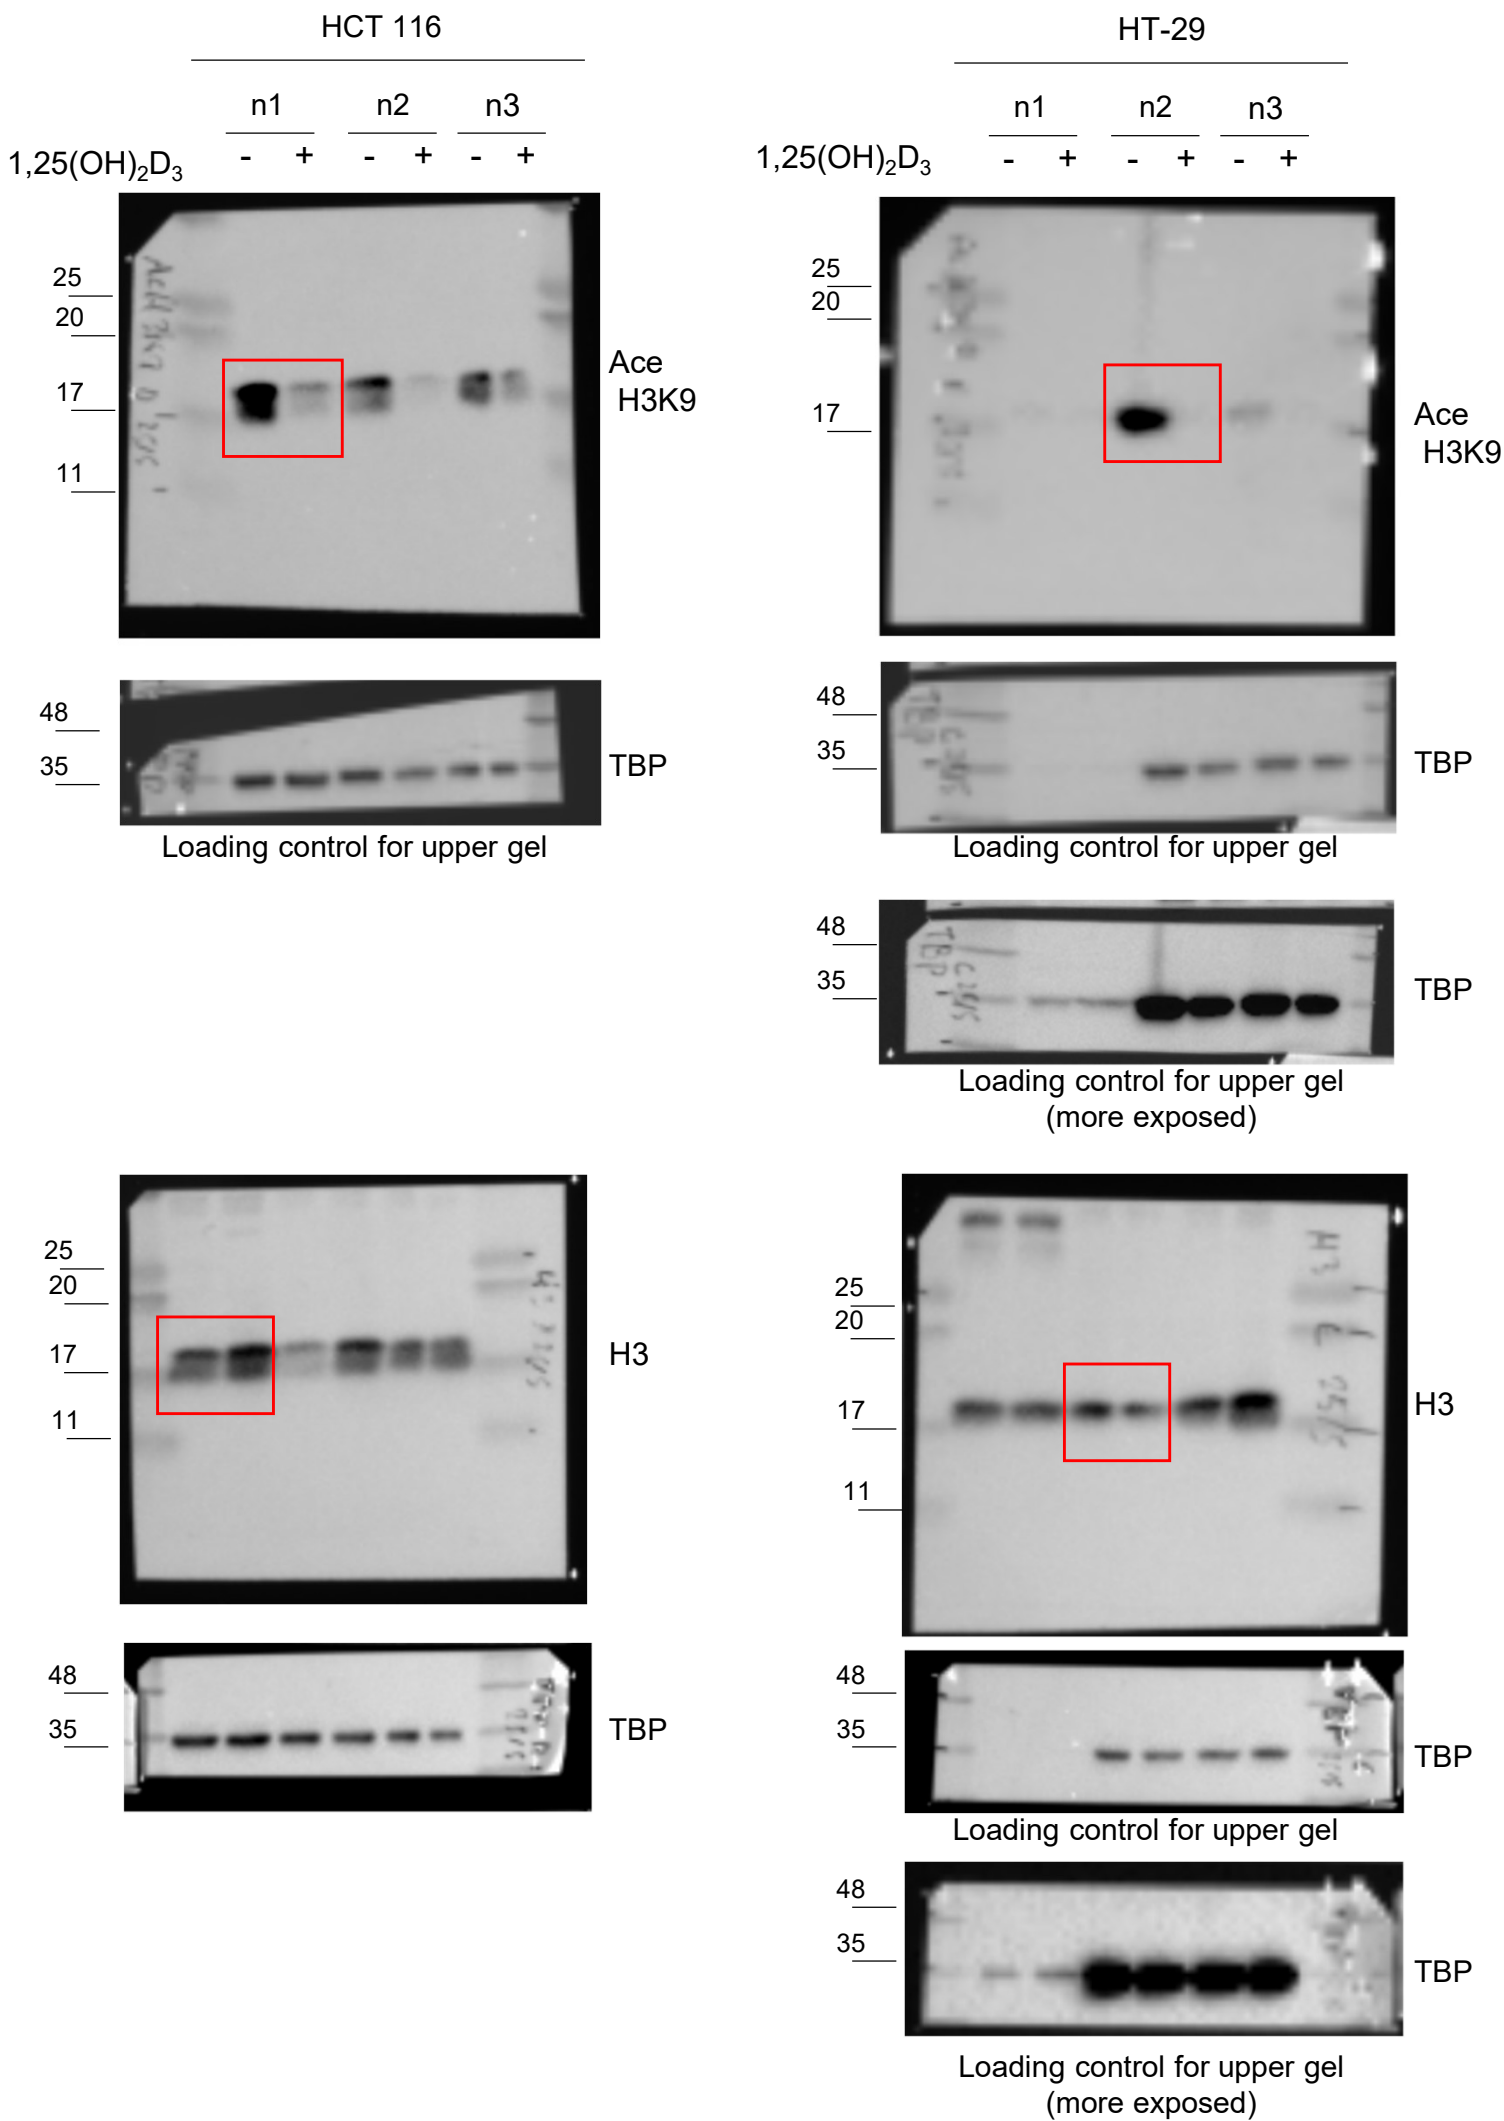

Supplement: fig2-data1 [file PDF Fig 2E.pdf › Fig2_source data/Fig 2E_raw TIFFand PDF/PDF Fig 2E.pdf]

Figure 2F

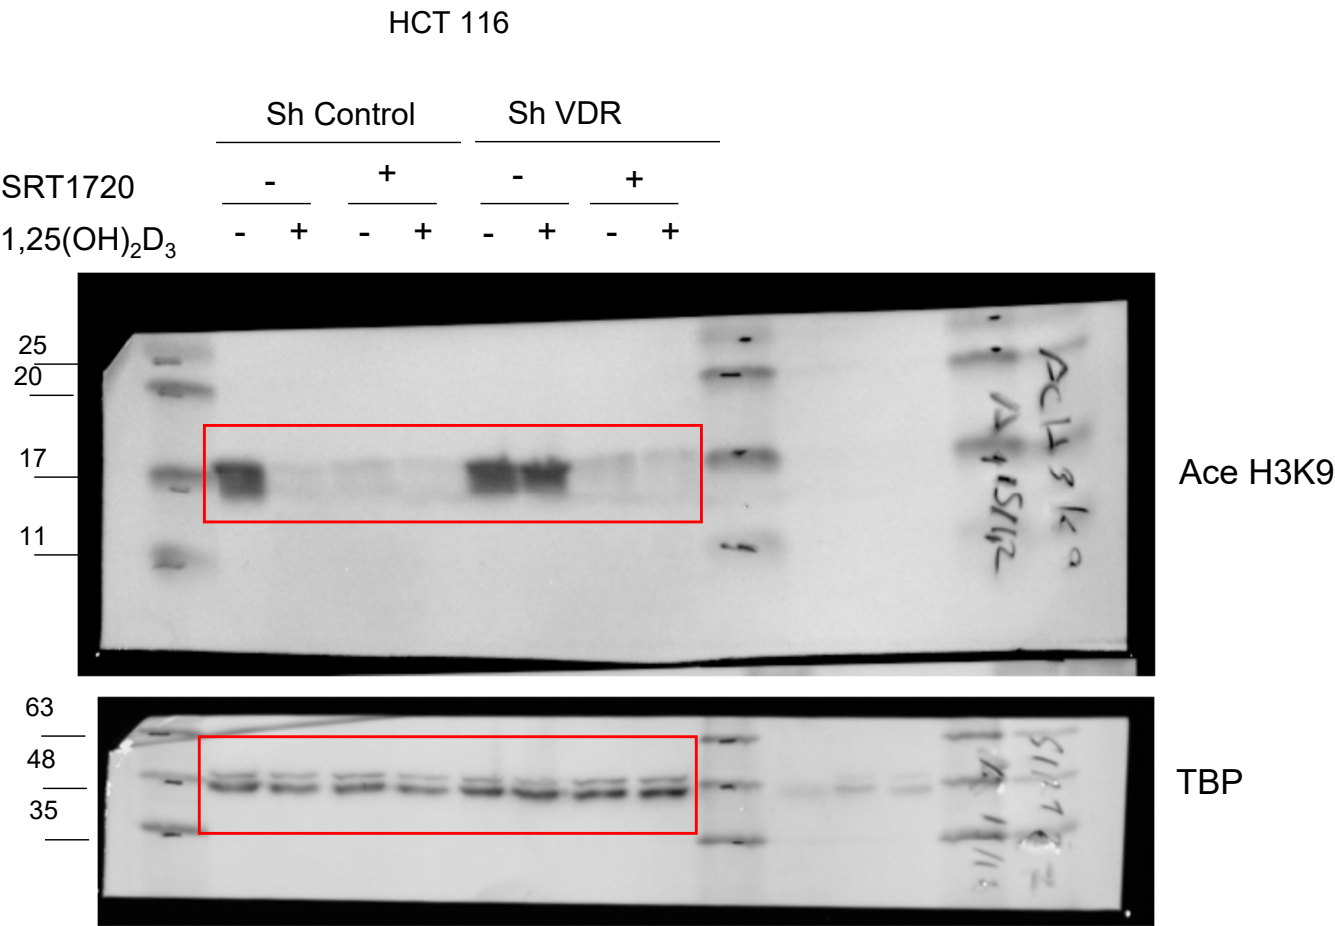

Supplement: fig2-data1 [file Fig.2F_raw data_pdf.pdf › Fig2_source data/Fig 2F_raw TIFFand PDF/Fig.2F_raw data_pdf.pdf]

Figure 2G

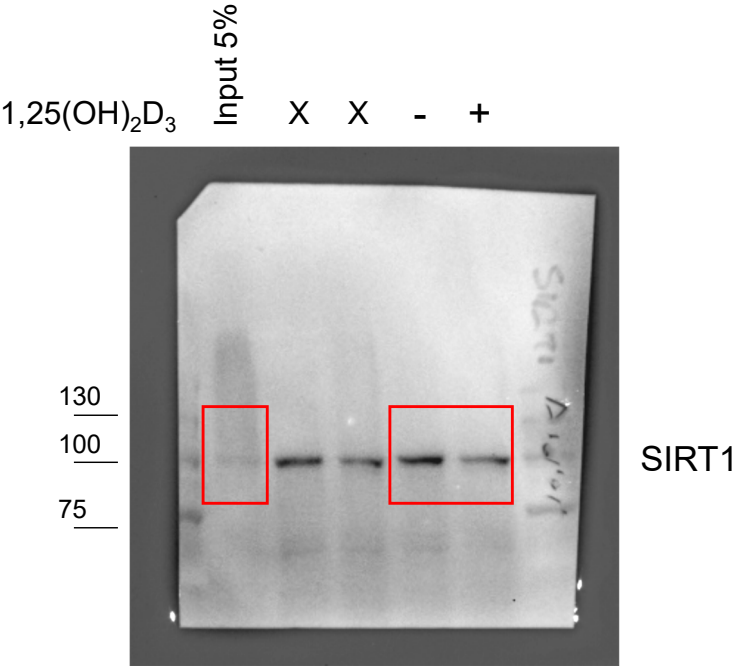

Supplement: fig2-data1 [file Fig.2G_raw data_pdf.pdf › Fig2_source data/Fig 2G_raw TIFFand PDF/Fig.2G_raw data_pdf.pdf]

Figure 3J

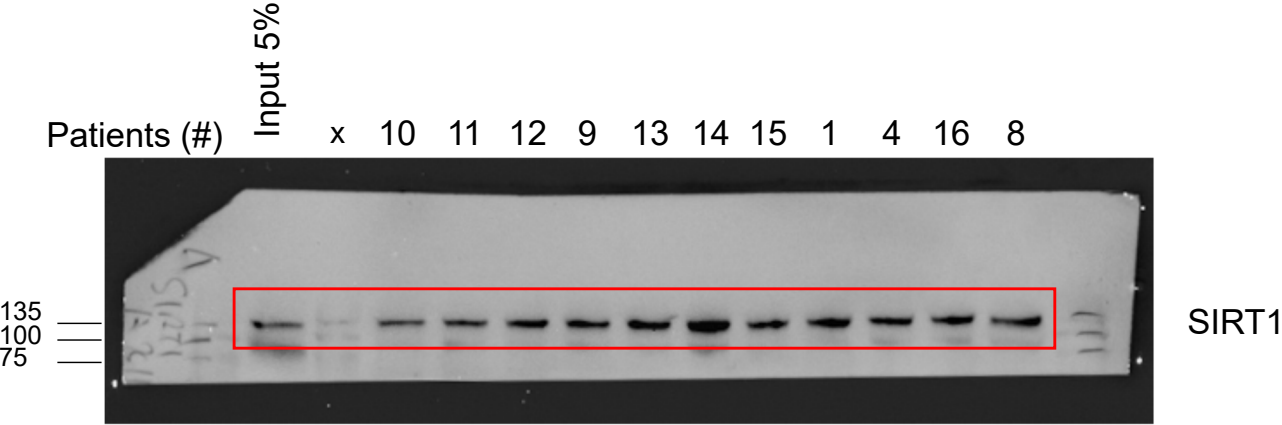

Supplement: fig3-data1 [file elife-86913-fig3-data1-v1.zip]

Figure 3F

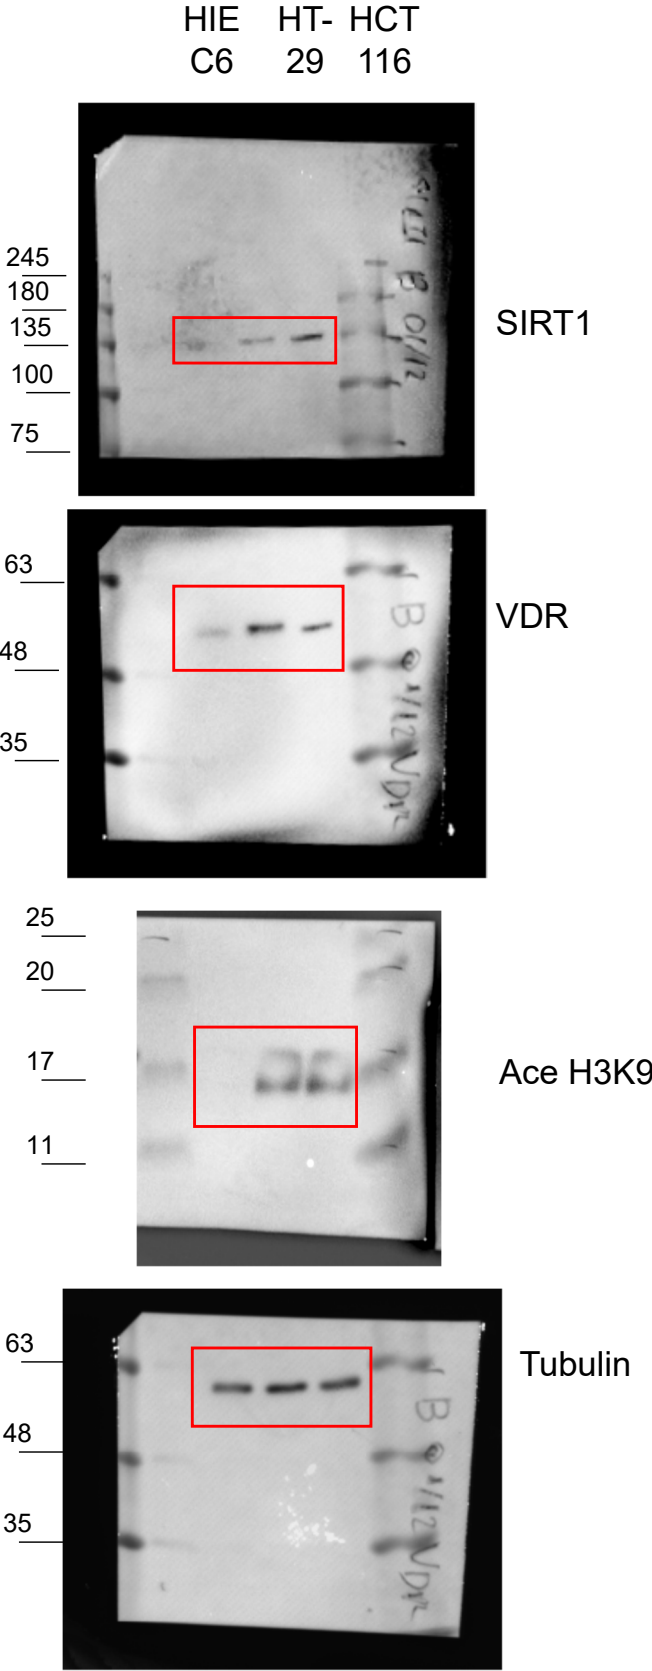

Supplement: fig3-data1 [file elife-86913-fig3-data1-v1.zip]

Figure 3I

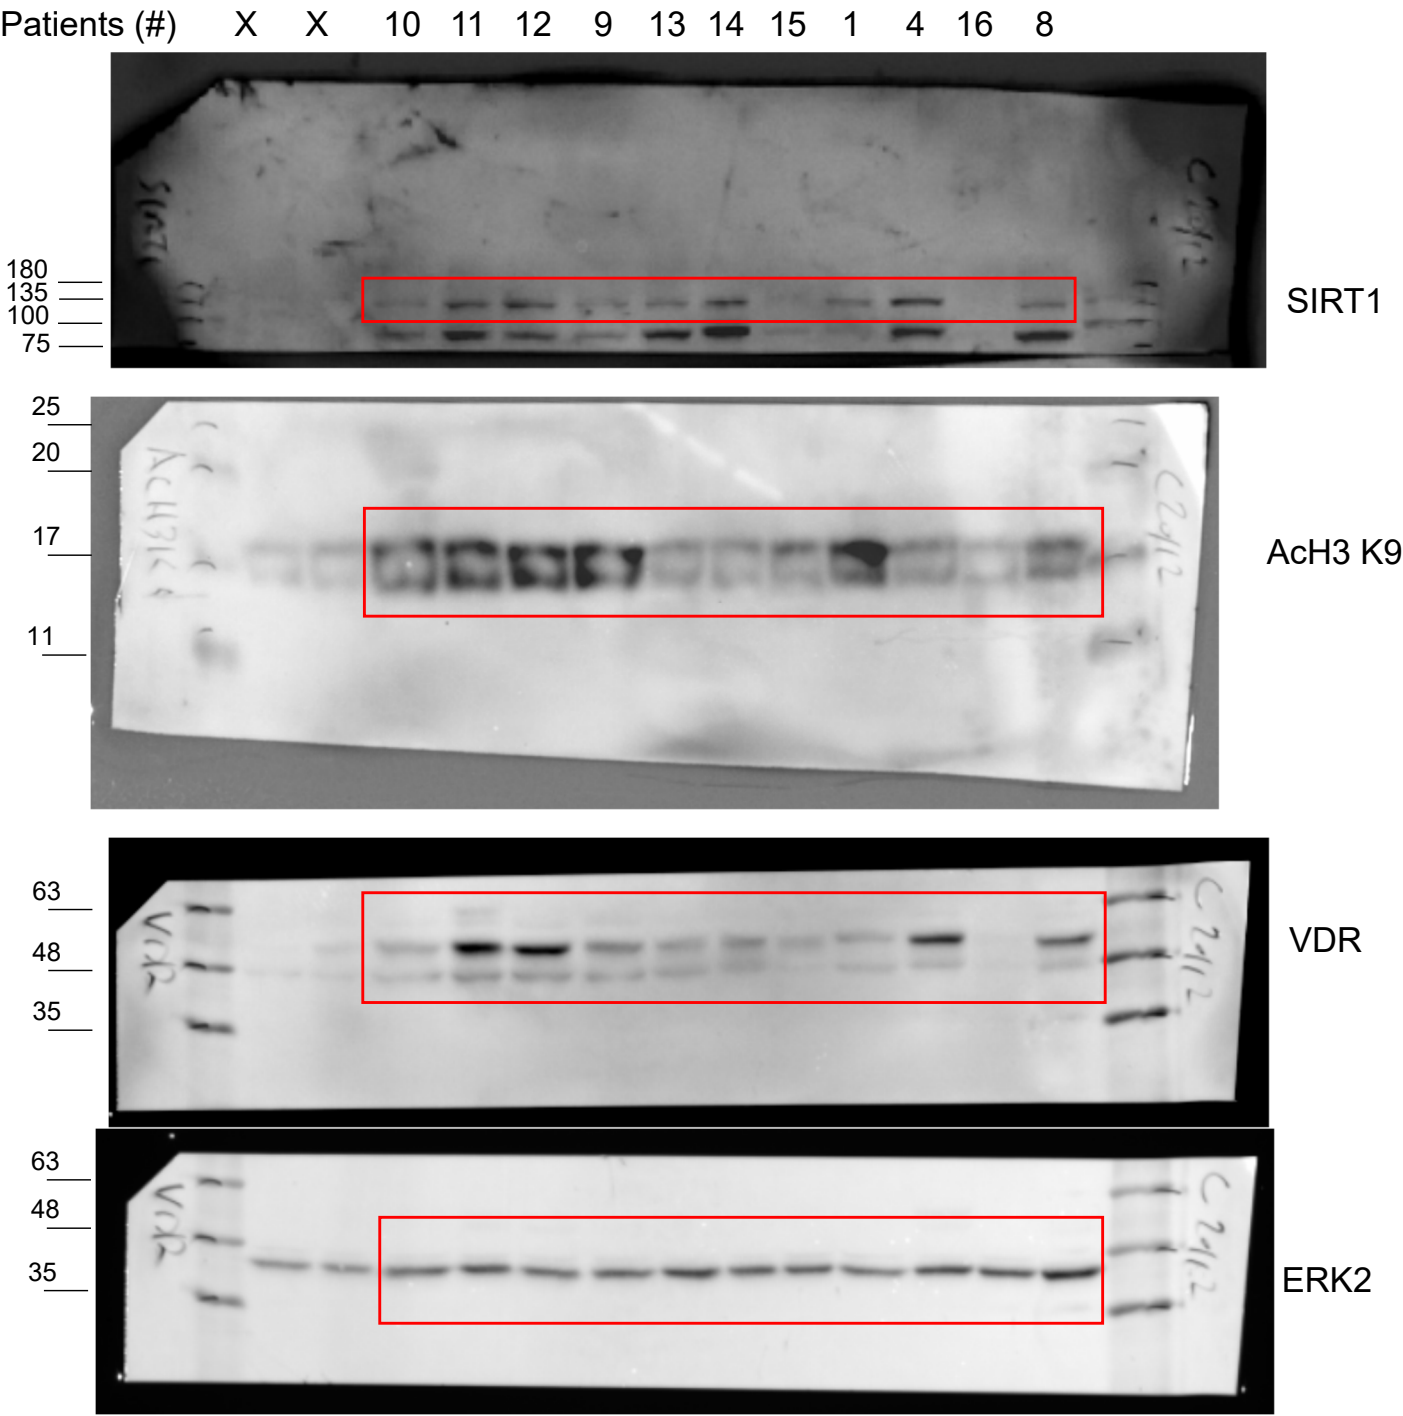

Supplement: fig3-data1 [file elife-86913-fig3-data1-v1.zip]

Figure 3H

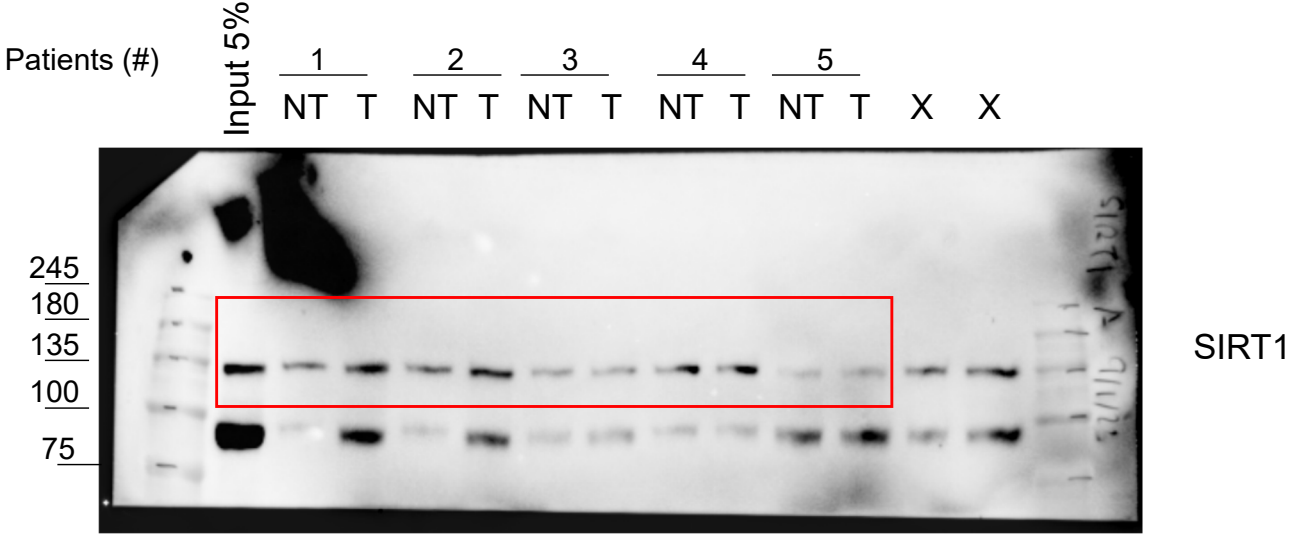

Supplement: fig3-data1 [file elife-86913-fig3-data1-v1.zip]

Figure 3G

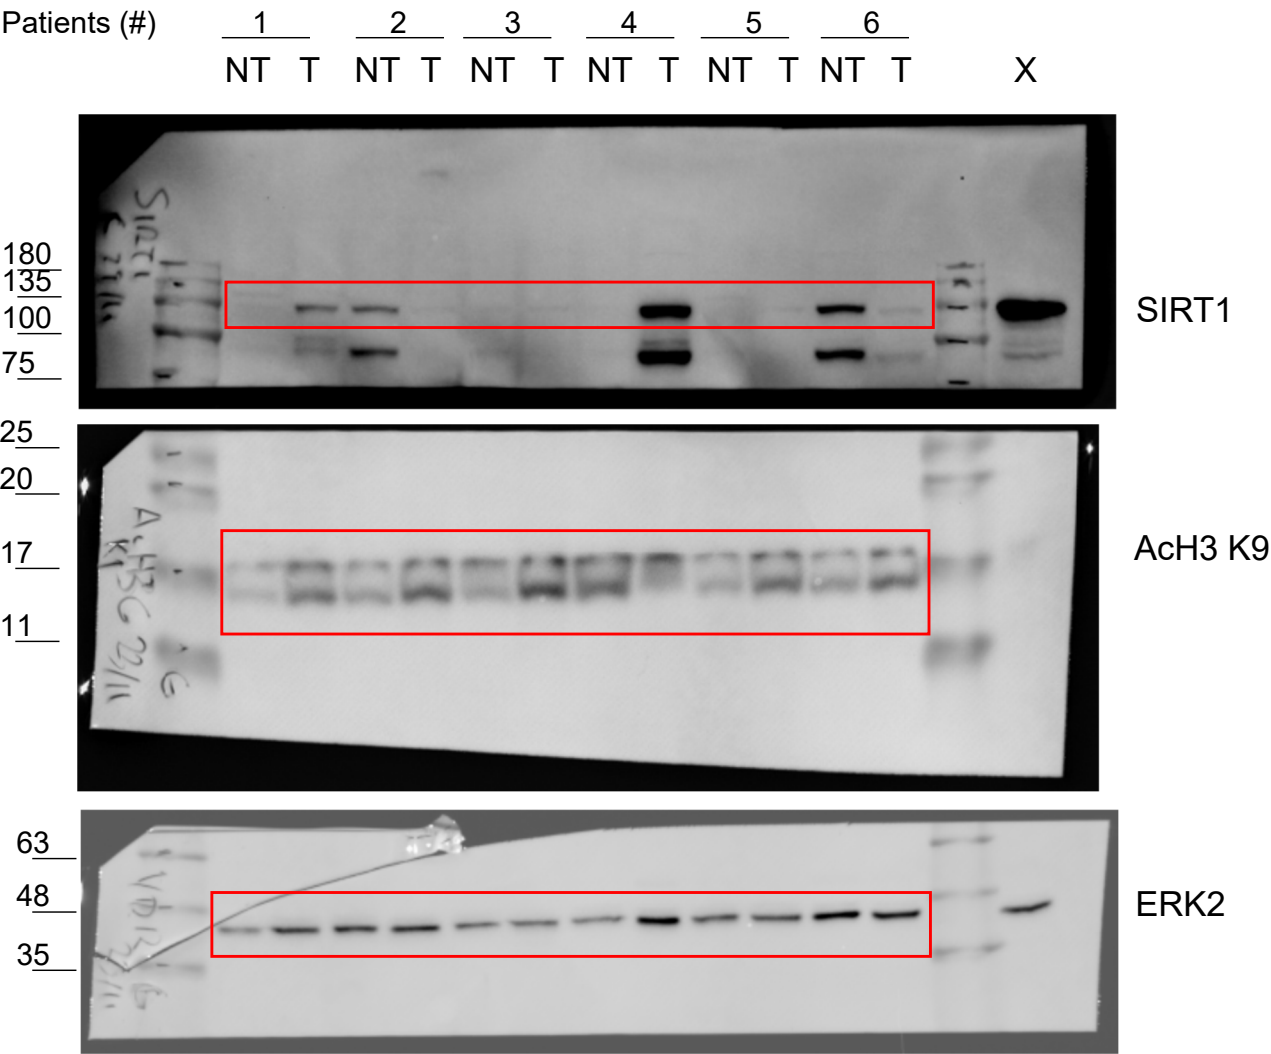

Supplement: fig3-data1 [file elife-86913-fig3-data1-v1.zip]

Figure 4A

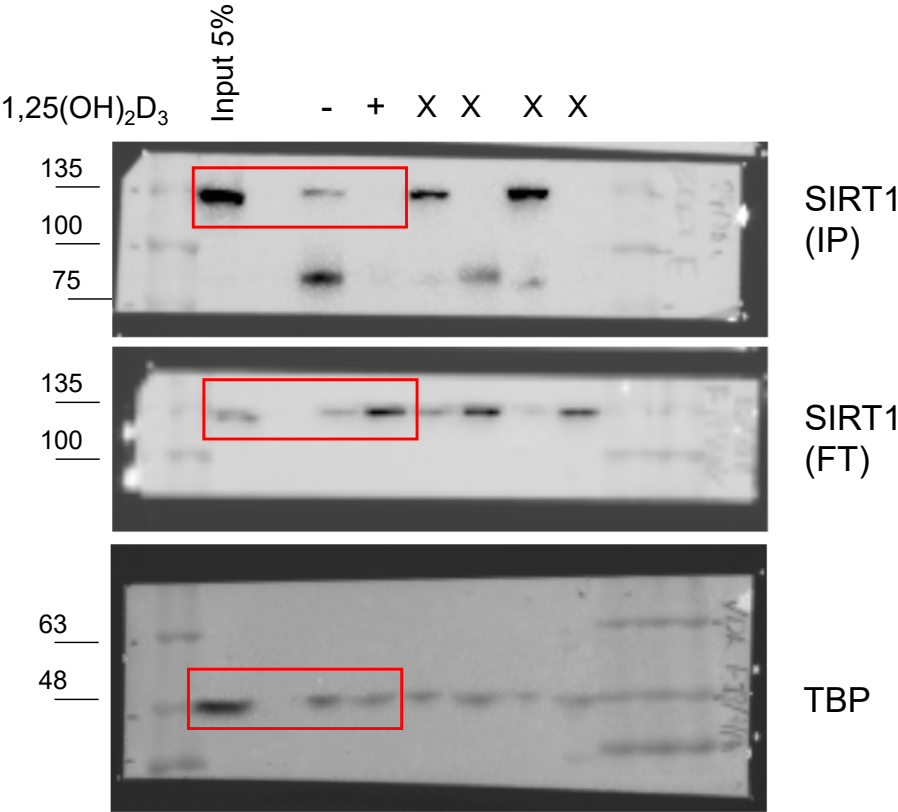

Supplement: fig4-data1 [file Fig.4A_raw data_pdf.pdf › Fig4_source data/Fig.4A_raw data_pdf and TIFF/Fig.4A_raw data_pdf.pdf]

Figure 4B

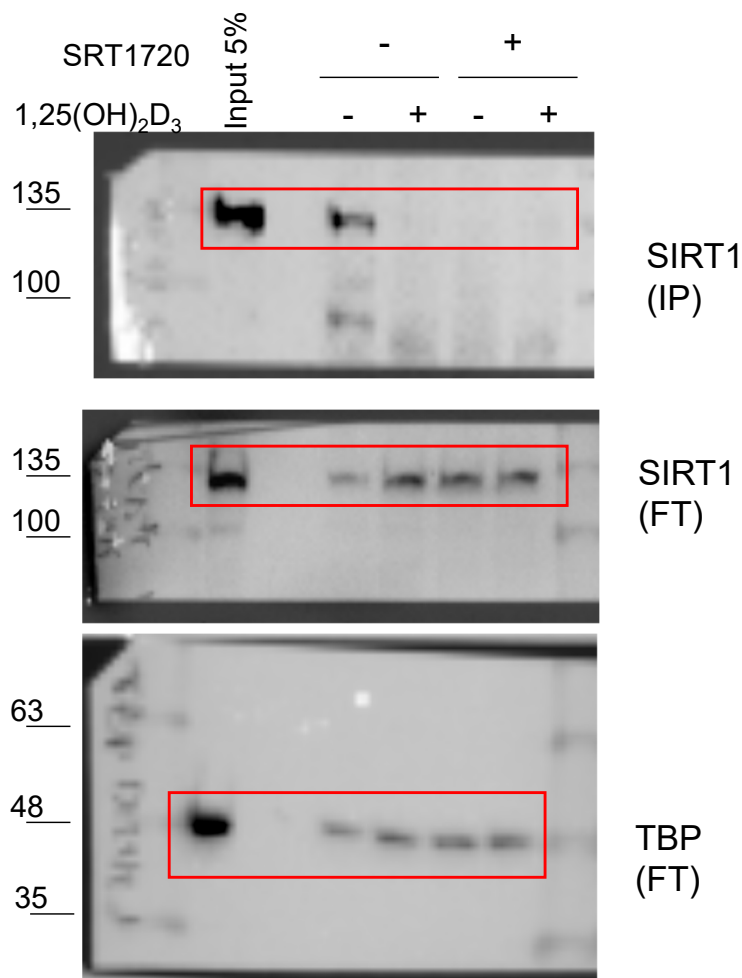

Supplement: fig4-data1 [file Fig.4B_raw data_pdf.pdf › Fig4_source data/Fig.4B_raw data_pdf and TIFF/Fig.4B_raw data_pdf.pdf]

Figure 4C

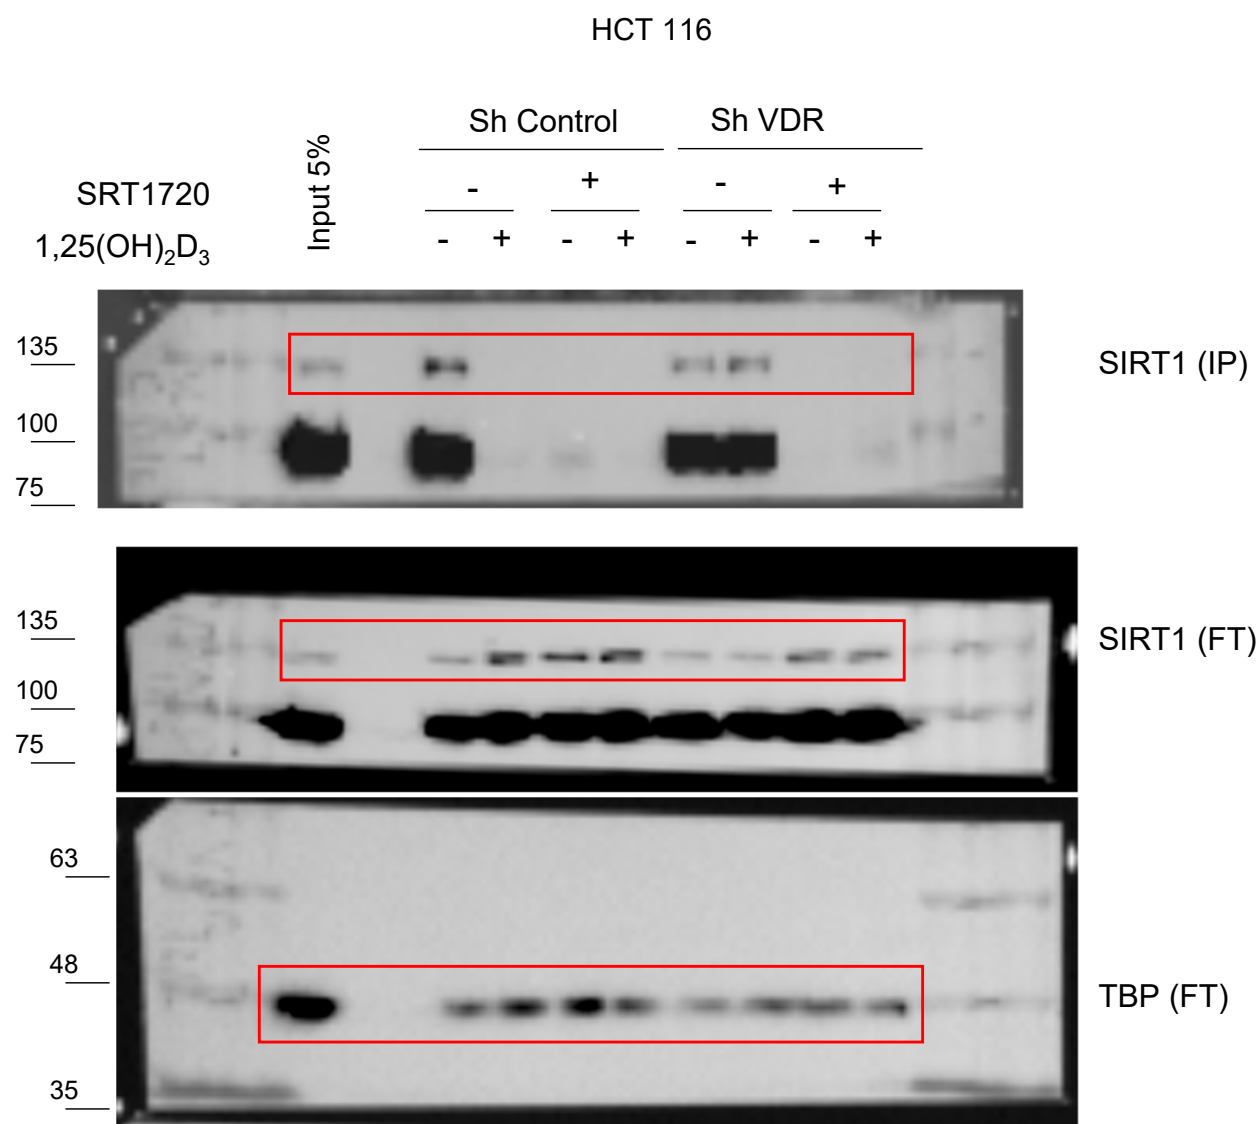

Supplement: fig4-data1 [file Fig.4C_raw data_pdf.pdf › Fig4_source data/Fig.4C_raw data_pdf and TIFF/Fig.4C_raw data_pdf.pdf]

Figure 4E

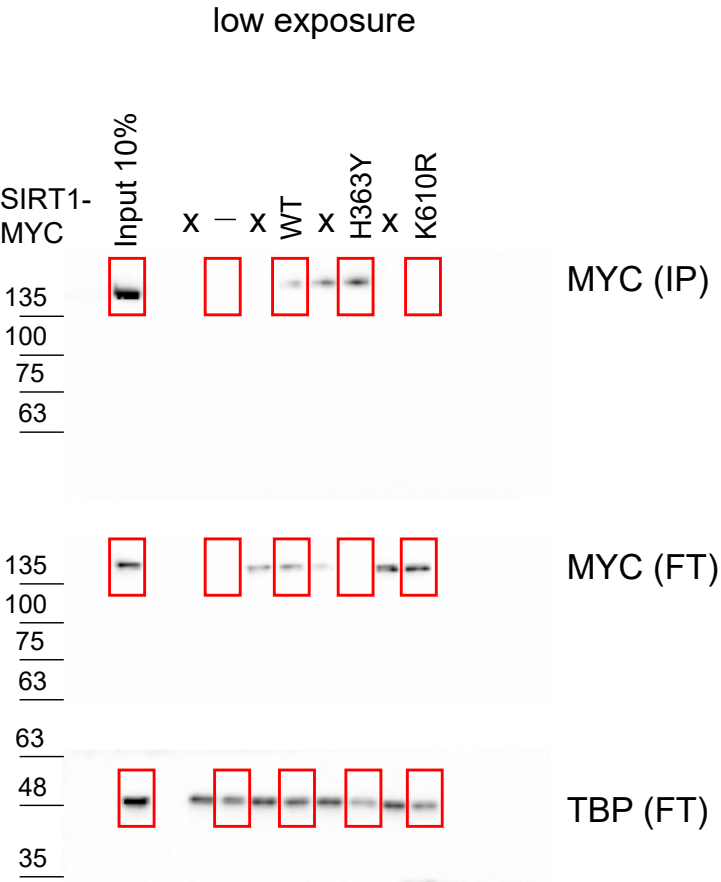

Supplement: fig4-data1 [file Fig.4E_raw data_pdf.pdf › Fig4_source data/Fig.4E_raw data_pdf and TIFF/Fig.4E_raw data_pdf.pdf]

Figure 4F

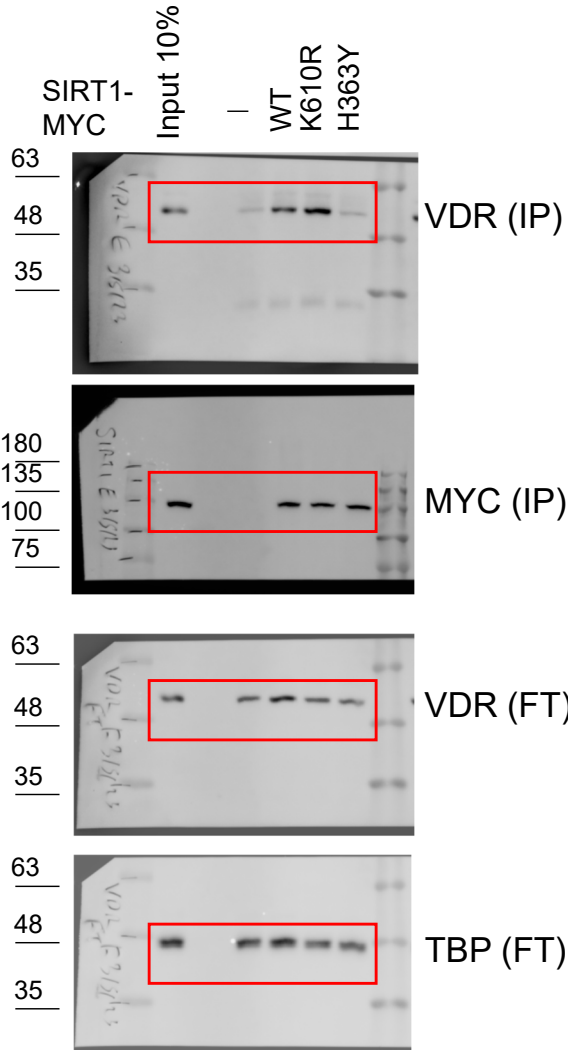

Supplement: fig4-data1 [file Fig.4F_raw data_pdf.pdf › Fig4_source data/Fig.4F_raw data_pdf and TIFF/Fig.4F_raw data_pdf.pdf]

Figure 4G

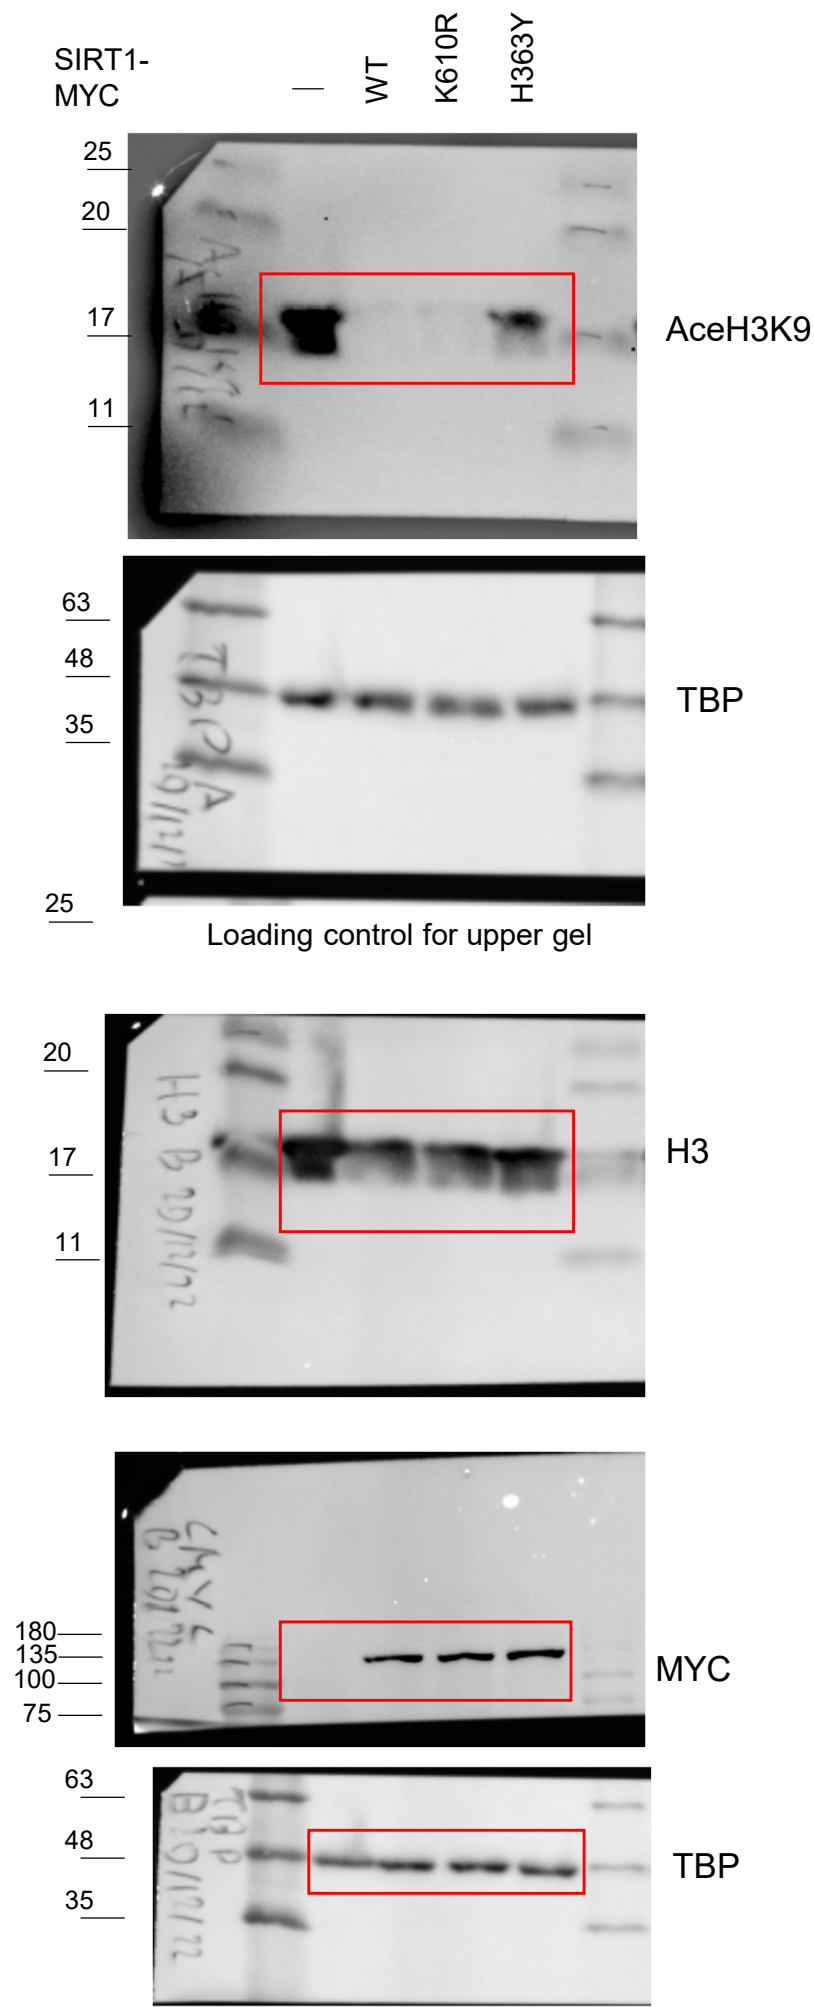

Supplement: fig4-data1 [file PDF Fig 4G.pdf › Fig4_source data/Fig.4G_raw data_pdf and TIFF/PDF Fig 4G.pdf]
